# Supplementary material
Source: PubMed Central journal article supplement (PMC10050416)
Supplement: 41467_2023_37254_MOESM1_ESM.pdf [file 41467_2023_37254_MOESM1_ESM.pdf]

## Supplementary Information for

### Potent and Selective Covalent Inhibition of the Papain-like Protease from SARS-CoV-2

Brian C. Sanders,<sup>1,†,\*</sup> Suman Pokhrel,<sup>2,3,†</sup> Audrey D. Labbe,<sup>1</sup> Irimpan I. Mathews,<sup>4</sup> Connor J. Cooper,<sup>1</sup> Russell B. Davidson,<sup>1</sup> Gwyndalyn Phillips,<sup>5</sup> Kevin L. Weiss,<sup>5</sup> Qiu Zhang,<sup>5</sup> Hugh O'Neill,<sup>5</sup> Manat Kaur,<sup>6</sup> Jurgen G. Schmidt,<sup>7</sup> Walter Reichard,<sup>8</sup> Surekha Surendranathan,<sup>9</sup> Jyothi Parvathareddy,<sup>9</sup> Lexi Phillips,<sup>10</sup> Christopher Rainville,<sup>11</sup> David E. Sterner,<sup>11</sup> Desigan Kumaran,<sup>12</sup> Babak Andi,<sup>13</sup> Gyorgy Babnigg,<sup>14,15</sup> Nigel W. Moriarty,<sup>16</sup> Paul D. Adams,<sup>16,17</sup> Andrzej Joachimiak,<sup>14,18</sup> Brett L. Hurst,<sup>10</sup> Suresh Kumar,<sup>11</sup> Tauseef R. Butt,<sup>11</sup> Colleen B. Jonsson,<sup>8</sup> Lori Ferrins,<sup>19</sup> Soichi Wakatsuki,<sup>2,3,\*</sup> Stephanie Galanie,<sup>1</sup> Martha S. Head,<sup>20,21</sup> and Jerry M. Parks<sup>1,\*</sup>

<sup>1</sup> Biosciences Division, Oak Ridge National Laboratory, Oak Ridge, Tennessee, USA

<sup>2</sup> Department of Chemical and Systems Biology, Stanford University School of Medicine, Stanford, California, USA

<sup>3</sup> Biological Sciences Division, SLAC National Accelerator Laboratory, Menlo Park, California, USA

<sup>4</sup> Stanford Synchrotron Radiation Lightsource, Menlo Park, California, USA

<sup>5</sup> Neutron Scattering Division, Oak Ridge National Laboratory, Oak Ridge, Tennessee, USA

<sup>6</sup> Department of Structural Biology, Stanford University School of Medicine, Stanford, California, USA

<sup>7</sup> B-11 Bioenergy and Biome Sciences, Bioscience Division, Los Alamos National Laboratory, Los Alamos, New Mexico, USA

<sup>8</sup> Department of Microbiology, Immunology and Biochemistry, University of Tennessee Health Science Center, Memphis, Tennessee, USA

<sup>9</sup> Regional Biocontainment Laboratory, University of Tennessee Health Science Center, Memphis, TN, USA

<sup>10</sup> Institute for Antiviral Research, Department of Animal, Dairy, and Veterinary Sciences, Utah State University; Logan, UT, USA

<sup>11</sup> Progenra Inc., Malvern, Pennsylvania, USA

<sup>12</sup> Biology Department, Brookhaven National Laboratory, Upton, New York, USA

<sup>13</sup> Center for BioMolecular Structure, National Synchrotron Light Source II, Brookhaven National Laboratory, Upton, New York, USA

<sup>14</sup> Center for Structural Genomics of Infectious Diseases, Consortium for Advanced Science and Engineering, University of Chicago, Chicago, Illinois, USA

<sup>15</sup> Biosciences Division, Argonne National Laboratory, Argonne, Illinois, USA

<sup>16</sup> Molecular Biosciences and Integrated Bioimaging, Lawrence Berkeley National Laboratory, Berkeley, California, USA

<sup>17</sup> Department of Bioengineering, University of California, Berkeley, CA, USA

<sup>18</sup> Structural Biology Center, X-ray Science Division, Argonne National Laboratory, Argonne, IL, USA. Department of Chemistry, University of Chicago, Chicago, Illinois, USA

<sup>19</sup> Department of Chemistry and Chemical Biology, Northeastern University, Boston, Massachusetts, USA

<sup>20</sup> Joint Institute for Biological Sciences, Oak Ridge National Laboratory, Oak Ridge, Tennessee USA

<sup>21</sup> Computing and Computational Sciences Directorate, Oak Ridge National Laboratory, Oak Ridge, Tennessee USA

† These authors contributed equally to this work.

\*Correspondence and requests for materials should be addressed to [sandersbc@ornl.gov](mailto:sandersbc@ornl.gov), [soichi.wakatsuki@stanford.edu](mailto:soichi.wakatsuki@stanford.edu), or [parksjm@ornl.gov](mailto:parksjm@ornl.gov).

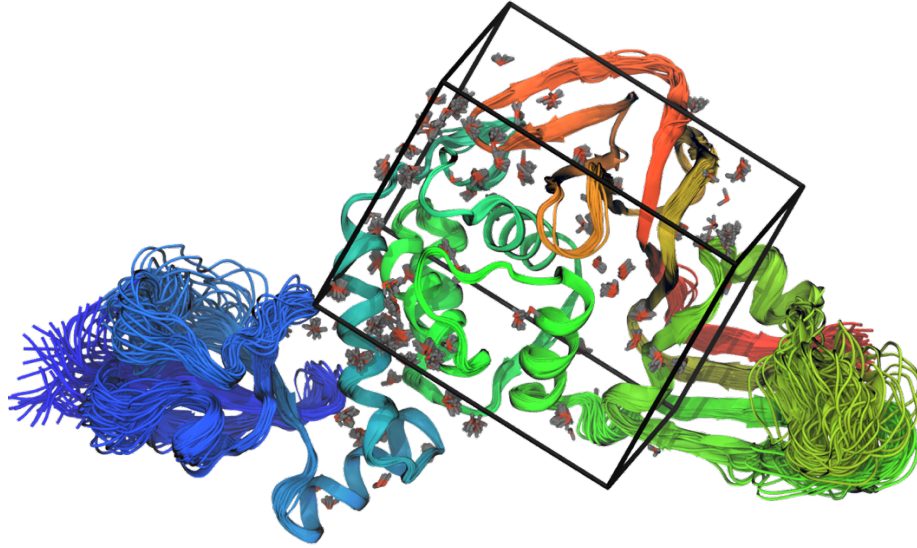

**Supplementary Figure 1.** Superposition of 50 ensemble models generated from crystallographic data for PDB entry 7JIR.<sup>14</sup> The protein is shown in spectrum coloring (blue = N-terminus, red = C-terminus). The docking box is shown in thick black lines. Conserved water molecules are shown in stick representation. Ser111 was mutated back to Cys in all models prior to docking.

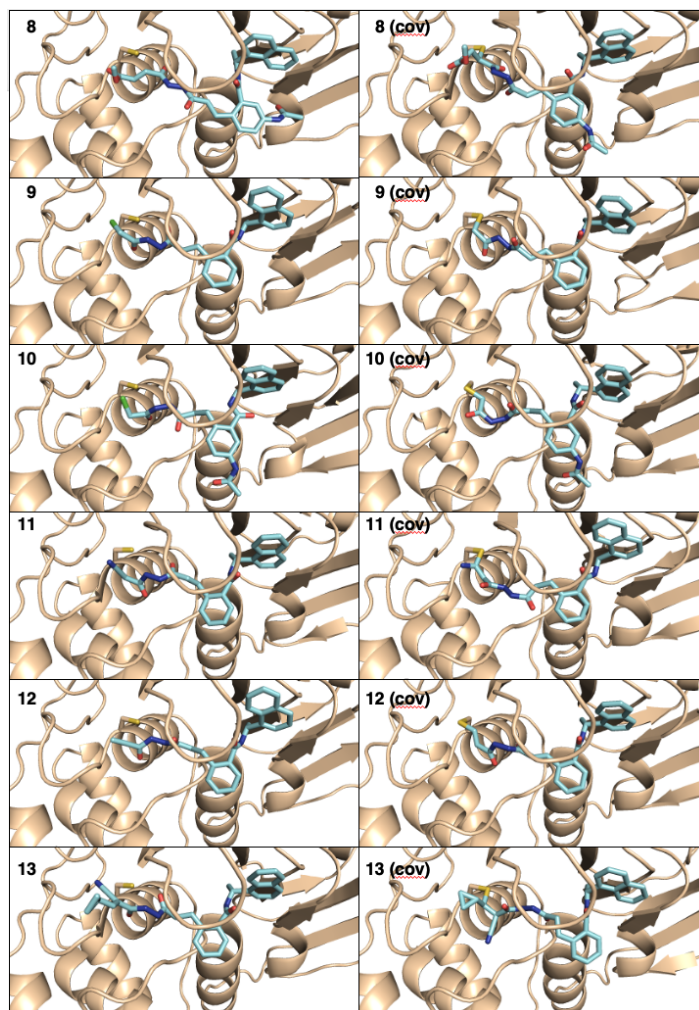

**Supplementary Figure 2.** Docked poses of compounds **8-13**. *Left: noncovalent, right: covalent.*

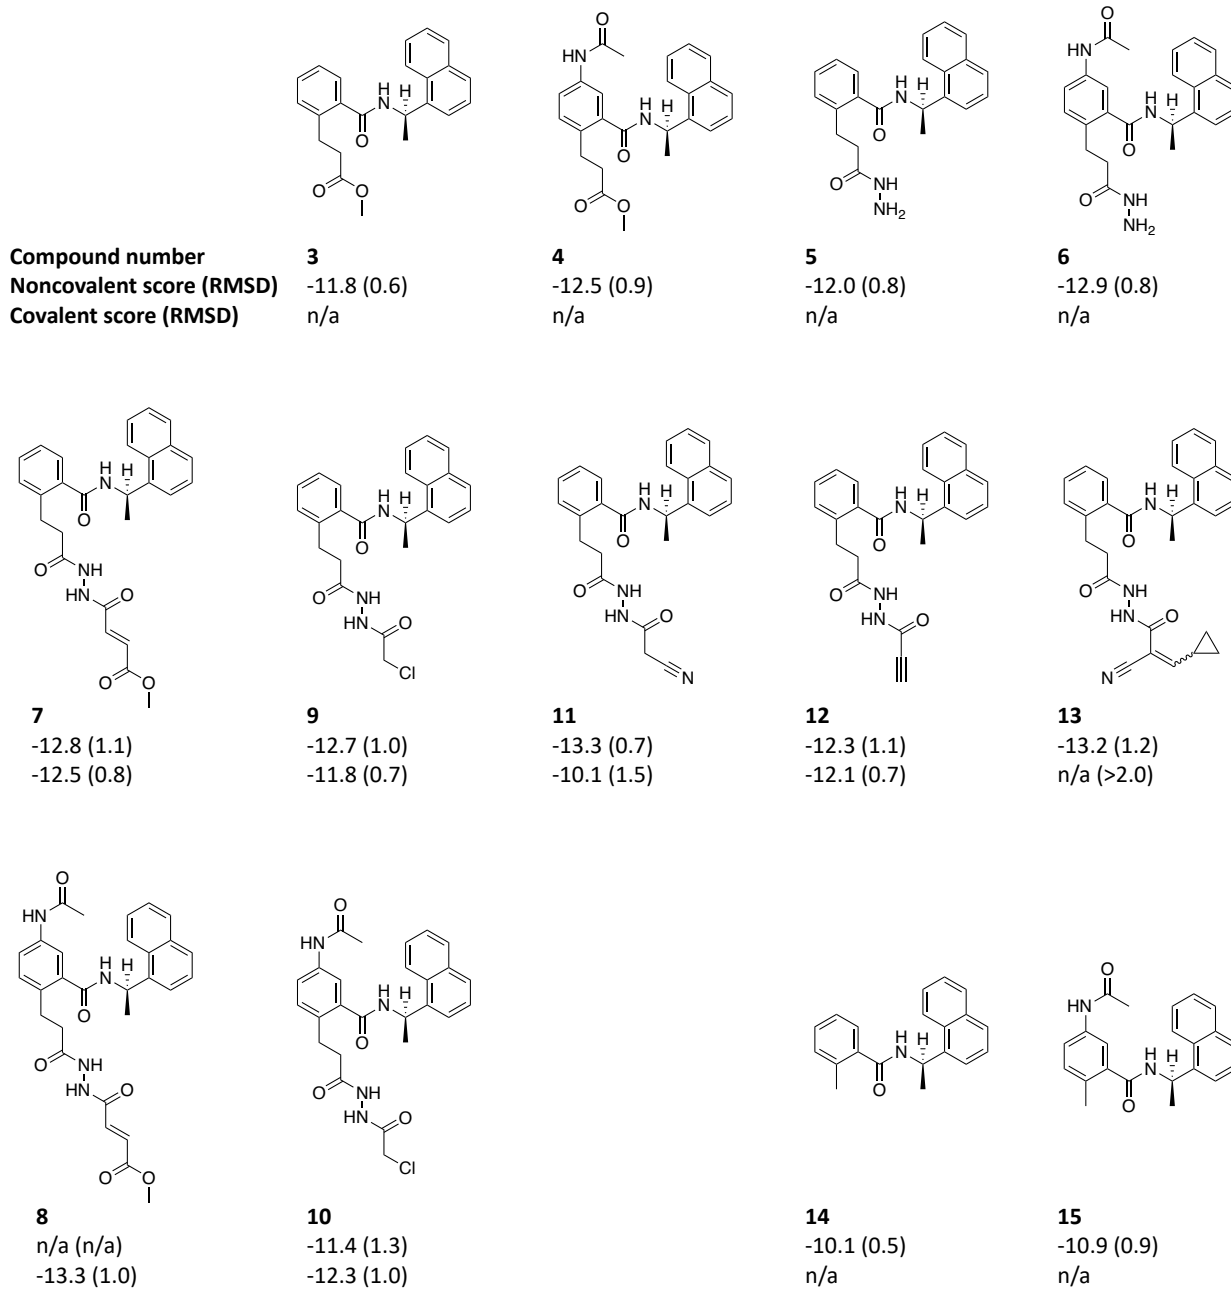

**Supplementary Figure 3.** Summary of docking results for experimentally tested compounds. Docking scores are in kcal/mol and MCS-RMSD values are in Å. Additional docking data for all candidate inhibitors are provided in **Supplementary Data File 1**.

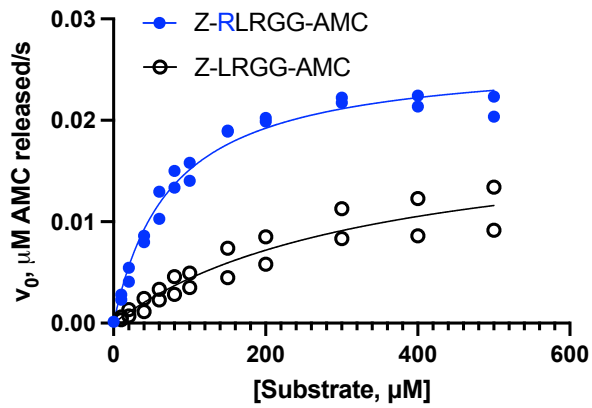

|                         | Z-RLRGG-AMC | Z-LRGG-AMC |
|-------------------------|-------------|------------|
| <b>Michaelis-Menten</b> |             |            |
| <b>Best-fit values</b>  |             |            |
| $V_{max}$               | 0.026       | 0.020      |
| $K_m$                   | 74          | 345        |
| <b>Goodness of Fit</b>  |             |            |
| Degrees of Freedom      | 22          | 22         |
| $R^2$                   | 0.98        | 0.91       |

**Supplementary Figure 4.** Michaelis-Menten kinetics data for Z-RLRGG-AMC and Z-LRGG-AMC substrates. Data points represent mean values for  $n = 2$  independent experiments. Units in the table correspond to those in the  $x$  and  $y$  axes of the plot, i.e.,  $\mu\text{M/s}$  for  $V_{max}$  and  $\mu\text{M}$  for  $K_m$ . Source data are provided as a Source Data file.

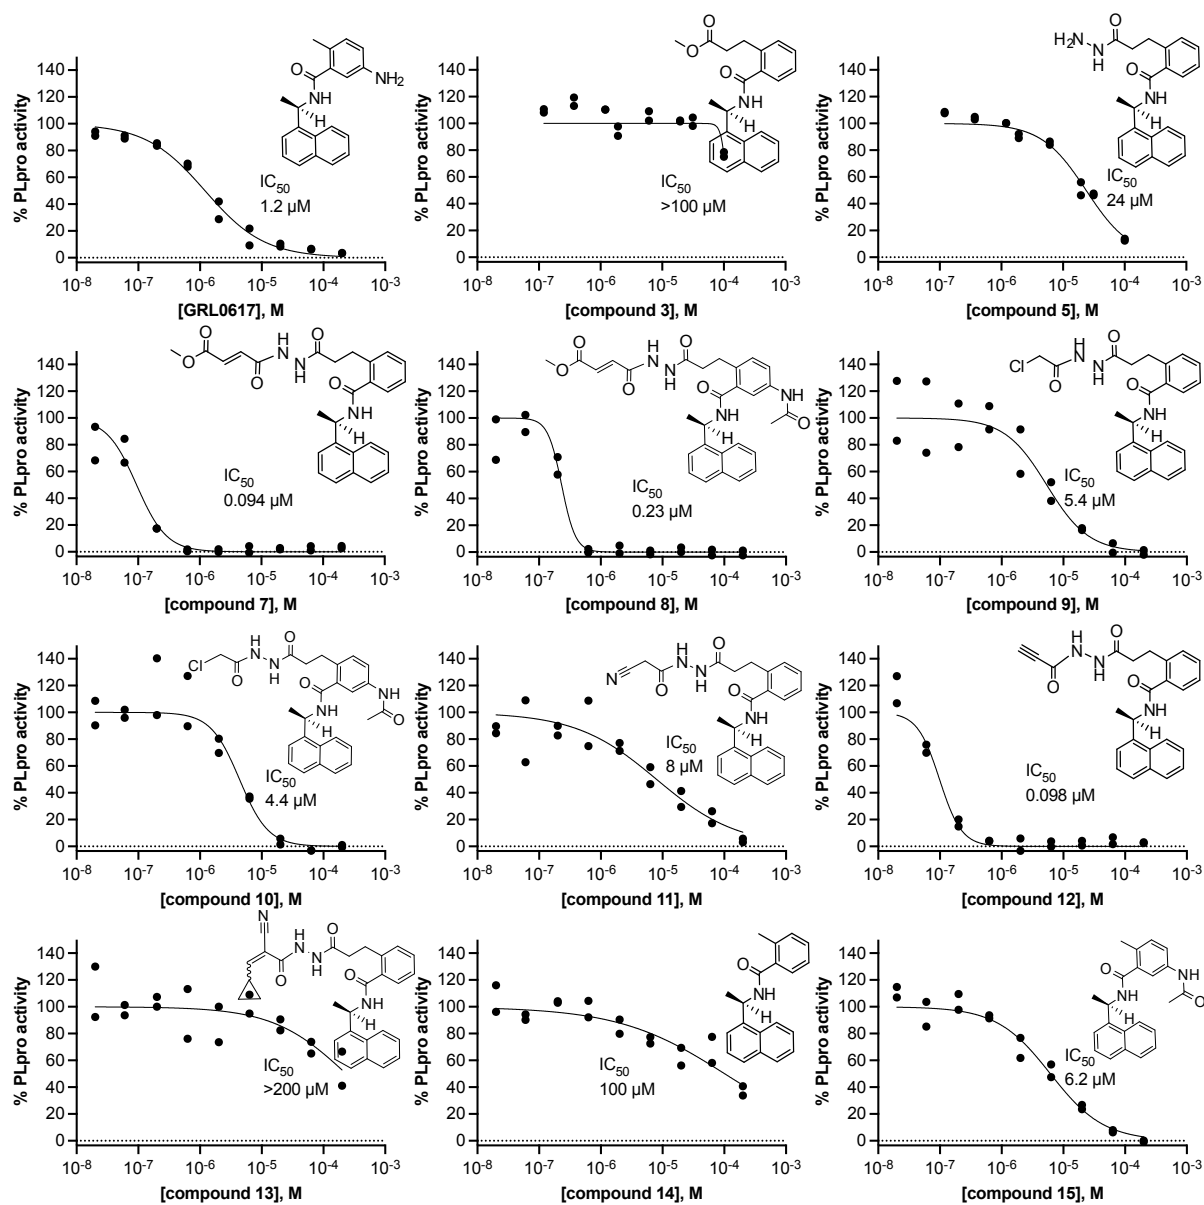

**Supplementary Figure 5.** Fluorogenic peptide activity assay after 30 min preincubation with inhibitor candidates. Data points represent the mean of  $n = 2$  independent samples.  $IC_{50}$  is the concentration at which 50% inhibition was observed. Curve is the nonlinear regression to the normalized inhibitor dose response equation. Source data are provided as a Source Data file.

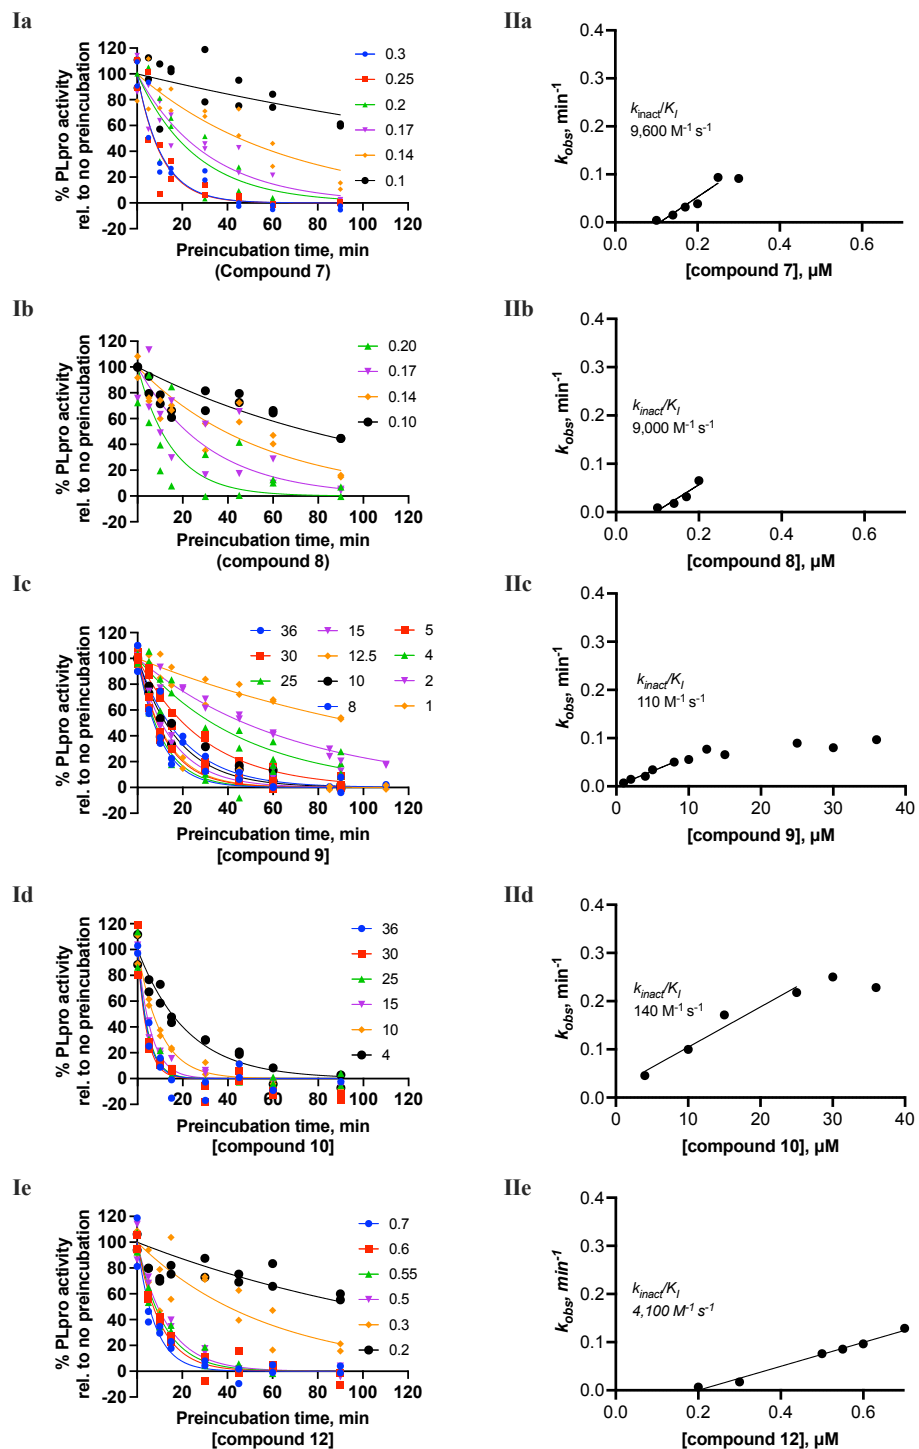

**Supplementary Figure 6.** Time-dependent characterization with fluorogenic peptide assay. Data in the left column (**Ia-e**) are initial rates determined at various inhibitor concentrations ( $\mu M$ ) with compound number in the  $x$ -axis label and preincubation times normalized to no preincubation. Data are shown for  $n = 2$  independent samples. Curves are nonlinear regressions of the exponential decay equation to the data. Data in the right column (**IIa-e**) are the mean  $k_{obs}$  values determined from **Ia-e**. Each line represents the linear regression yielding as its slope the second-order rate constant ( $k_{inact}/K_I$ ). Source data are provided as a Source Data file.

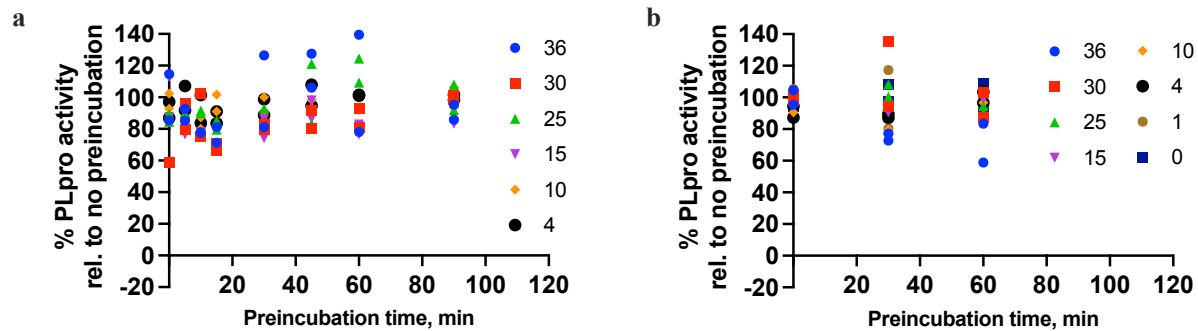

**Supplementary Figure 7.** Time-dependent characterization with fluorogenic peptide assay. **(a)** compound **11**, **(b)** compound **13**. Data are from  $n = 2$  independent samples. Source data are provided as a Source Data file.



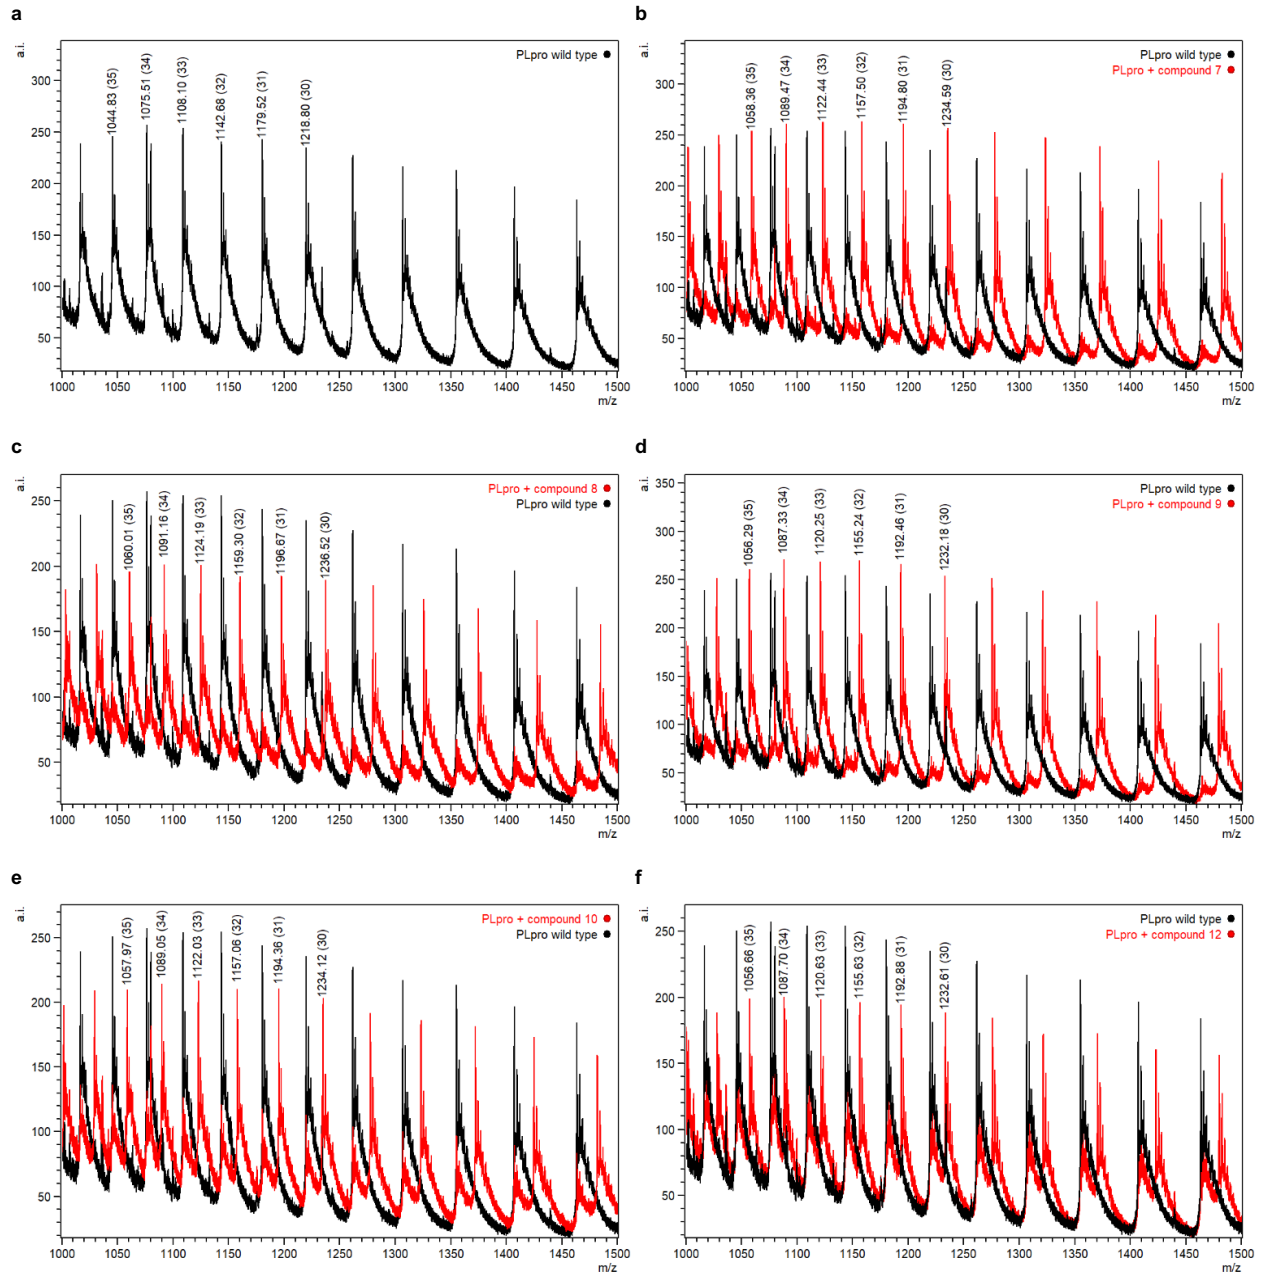

**Supplementary Figure 8.** Intact protein ESI-MS spectra of (a) PLpro (black), and (b-f), PLpro incubated with compounds indicated in the figure legends (red). a.i., arbitrary intensity; m/z, mass-to-charge ratio. Spectral peaks used for protein monoisotopic mass deconvolution are annotated with their monoisotopic masses and, in parentheses, charge states.

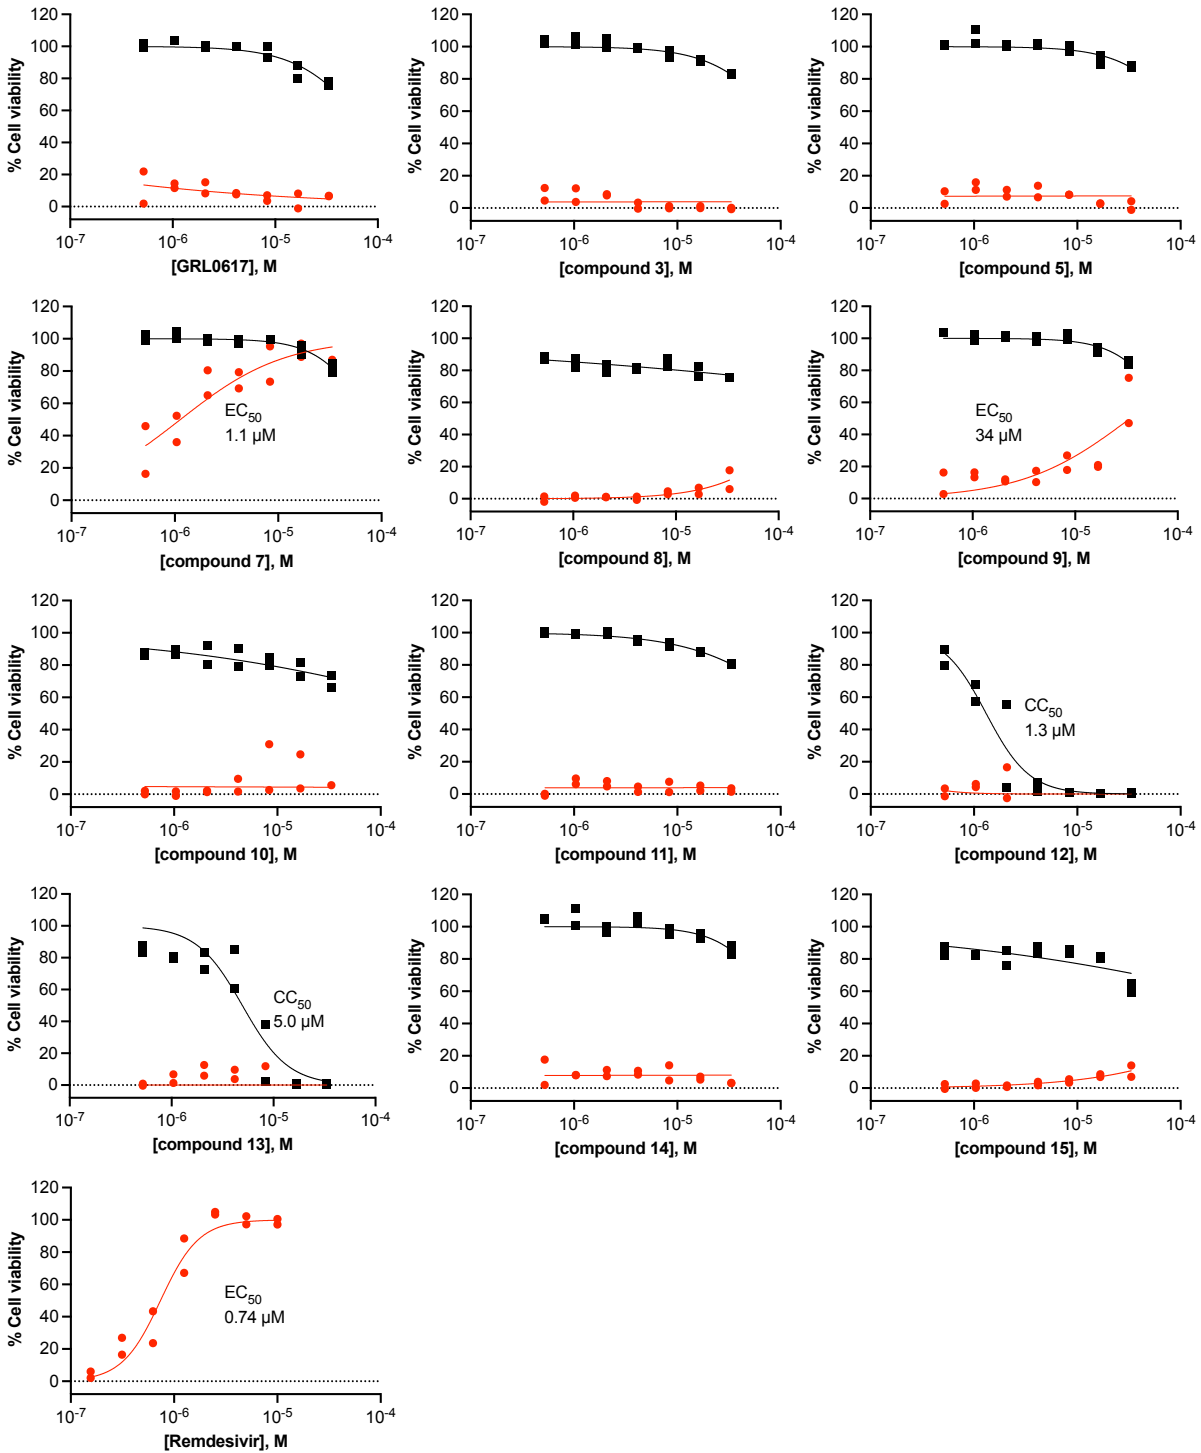

**Supplementary Figure 9.** Cell viability in Vero E6 cells for uninfected cells pretreated with indicated compound (black) and SARS-CoV-2-infected cells pretreated with indicated compound (red). Data are the mean of  $n = 2$  independent samples.  $EC_{50}$  is the concentration at which 50% effect was observed,  $CC_{50}$  is the concentration at which 50% cytotoxicity was observed. Curves are the nonlinear regression to the normalized dose response equation. Source data are provided as a Source Data file.

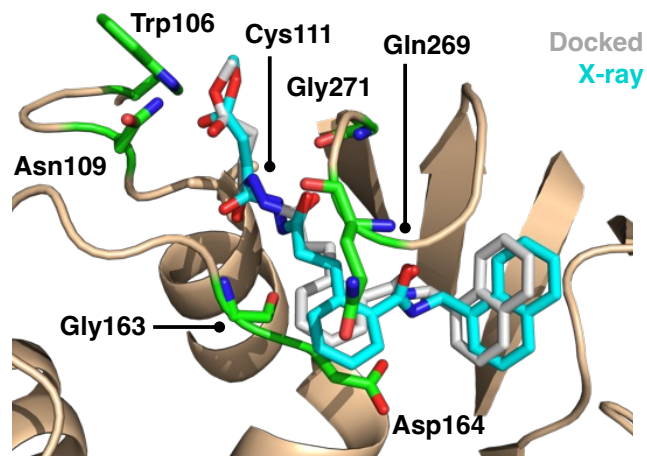

**Supplementary Figure 10.** Superposition of the covalently docked model of 7 (grey sticks) and the co-crystal structure of PLpro and 7 (cyan sticks). Selected residues in the binding site are labeled and shown as green sticks.

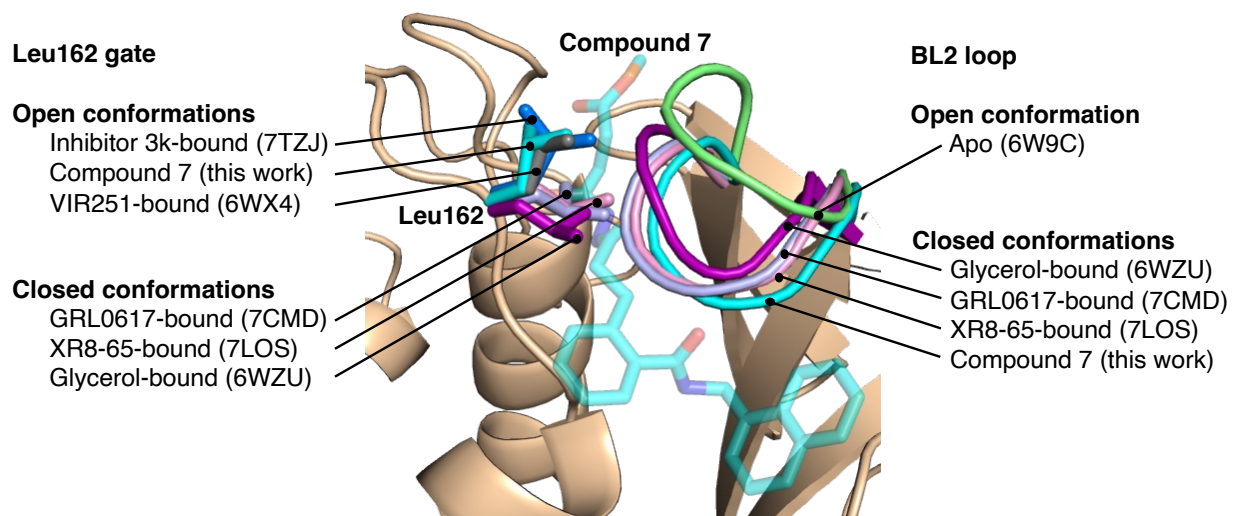

**Supplementary Figure 11.** Superposition of PLpro crystal structures highlighting different conformations of Leu162 (sticks) and the BL2 loop (cartoon): Ligand-free (PDB entry 6W9C, light green), glycerol-bound (PDB entry 6WZU, purple), inhibitor 3k-bound (PDB entry 7TZJ, marine blue), VIR251-bound (PDB entry 6WX4, grey), GRL0617-bound (PDB entry 7CMD, light purple), XR8-65-bound (PDB entry 7LOS, light pink) and compound 7-bound (this work, cyan). Compound 7 is shown as semi-transparent cyan sticks.

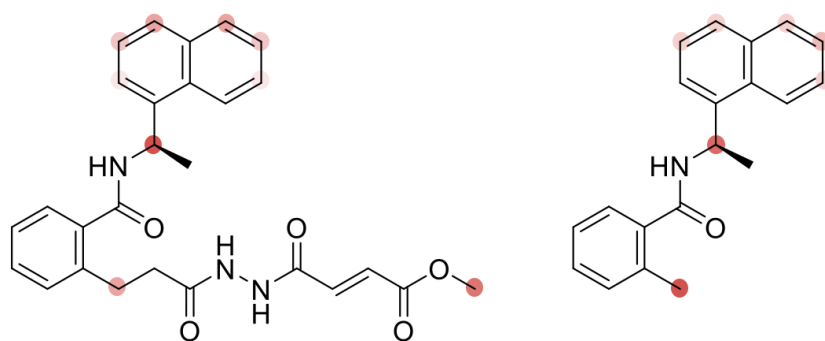

**Supplementary Figure 12.** MetaSite site-of-metabolism prediction for compound 7 (left) and 14 (right). The shade of the red circles indicates relative liability (darker = greater liability).

**Supplementary Table 1.** PLpro intact protein ESI-MS analysis.

| <b>Compound</b>     | <b>Deconvoluted monoisotopic PLpro + compound mass</b> | <b>Measured adduct mass</b> | <b>Predicted adduct mass</b> |
|---------------------|--------------------------------------------------------|-----------------------------|------------------------------|
| - (wild-type PLpro) | 36535 (FWHM 16)                                        | -                           | -                            |
| <b>7</b>            | 37009 (FWHM 16)                                        | 474                         | 473                          |
| <b>8</b>            | 37066 (FWHM 16)                                        | 531                         | 530                          |
| <b>9</b>            | 36936 (FWHM 15)                                        | 401                         | 401                          |
| <b>10</b>           | 36995 (FWHM 15)                                        | 460                         | 458                          |

FWHM = full-width half maximum

**Supplementary Table 2.** Deubiquitinase selectivity assay data.

| DUB, enzyme conc.<br>(substrate)  | Compound                       |               |                 |                                |               |                 |                                |               |                 |
|-----------------------------------|--------------------------------|---------------|-----------------|--------------------------------|---------------|-----------------|--------------------------------|---------------|-----------------|
|                                   | 15                             |               |                 | 9                              |               |                 | 7                              |               |                 |
|                                   | IC <sub>50</sub><br>( $\mu$ M) | Hill<br>slope | SI <sup>a</sup> | IC <sub>50</sub><br>( $\mu$ M) | Hill<br>slope | SI <sup>a</sup> | IC <sub>50</sub><br>( $\mu$ M) | Hill<br>slope | SI <sup>a</sup> |
| PLpro, 50 nM<br>(Ub-rhodamine110) | >30                            | 0.376         | N/A             | 1.96                           | 0.705         | N/A             | 0.076                          | 1.06          | N/A             |
| PLpro, 10 nM<br>(ISG15-CHOP2)     | >30                            | 0.969         | N/A             | 20.2                           | 0.817         | N/A             | 0.037                          | 1.34          | N/A             |
| USP30, 10 nM<br>(Ub-rhodamine110) | >30                            | N/A           | 1               | >30                            | N/A           | 15.3            | >30                            | N/A           | 394.7           |
| USP15, 1 nM<br>(Ub-rhodamine110)  | >30                            | N/A           | 1               | >30                            | N/A           | 15.3            | >30                            | N/A           | 394.7           |
| USP8, 10 nM<br>(Ub-rhodamine110)  | >30                            | N/A           | 1               | >30                            | N/A           | 15.3            | >30                            | N/A           | 394.7           |
| USP7, 5 nM<br>(Ub-CHOP2)          | >30                            | N/A           | 1               | >30                            | N/A           | 15.3            | >30                            | N/A           | 394.7           |
| USP4, 10 nM<br>(Ub-rhodamine110)  | >30                            | N/A           | 1               | >30                            | N/A           | 15.3            | >30                            | N/A           | 394.7           |
| USP2, 10 nM<br>(Ub-rhodamine110)  | >30                            | N/A           | 1               | >30                            | N/A           | 15.3            | >30                            | N/A           | 394.7           |
| UCHL1, 10 nM<br>(Ub-rhodamine110) | >30                            | N/A           | 1               | >30                            | N/A           | 15.3            | >30                            | N/A           | 394.7           |

<sup>a</sup> Selectivity index (SI) is represented as the fold change in selectivity for PLpro compared to DUB inhibition activity of other DUBs in the selectivity panel.

**Supplementary Table 3.** Summary of X-ray crystallography data collection and refinement

|                                            | PLpro compound 7                                    |
|--------------------------------------------|-----------------------------------------------------|
| <b>Crystallographic parameters</b>         |                                                     |
| Space group                                | I4 <sub>1</sub> 22                                  |
| Unit-cell dimensions                       | 112.33 Å, 112.33 Å, 217.33 Å<br>90.0°, 90.0°, 90.0° |
| <b>Data collection statistics</b>          |                                                     |
| Resolution limits (Å)                      | 39.1 – 3.10                                         |
| No. of observed reflections                | 333876                                              |
| No. of unique reflections                  | 13010                                               |
| Completeness                               |                                                     |
| overall/outer shell                        | 99.8/99.8                                           |
| CC1/2 (overall/outer shell)                | 99.8/75.2                                           |
| R <sub>sym</sub> <sup>a</sup> (%)          |                                                     |
| overall/outer shell & os I/σ               | 44.5/720.0 & 1.3                                    |
| <b>Refinement statistics</b>               |                                                     |
| Resolution limits (Å)                      | 39.1-3.10                                           |
| Number of reflections/%<br>( F  > 2σ F )   | 12359/99.8                                          |
| Reflections used for R <sub>free</sub>     | 651                                                 |
| R <sub>factor</sub> <sup>b</sup> (%)       | 19.1                                                |
| R <sub>free</sub> (%)                      | 25.3                                                |
| Model contents/average B (Å <sup>2</sup> ) |                                                     |
| Protein atoms                              | 2468/97.4                                           |
| Ligand                                     | 35/81.7                                             |
| Ions                                       | 8/101.9                                             |
| Water molecules                            | 42/71.6                                             |
| RMS deviations                             |                                                     |
| Bond length (Å)                            | 0.008                                               |
| Bond angle (°)                             | 1.79                                                |
| Ramachandran<br>(analyzed/outliers)        | 311/5                                               |



**Supplementary Table 4.** Metabolic stability<sup>a</sup> in liver microsomes

|             | human           |                                                   | rat             |                                                   | mouse           |                                                   |
|-------------|-----------------|---------------------------------------------------|-----------------|---------------------------------------------------|-----------------|---------------------------------------------------|
|             | half-life (min) | $Cl_{int}$ ( $\mu\text{L}/\text{min}/\text{mg}$ ) | half-life (min) | $Cl_{int}$ ( $\mu\text{L}/\text{min}/\text{mg}$ ) | half-life (min) | $Cl_{int}$ ( $\mu\text{L}/\text{min}/\text{mg}$ ) |
| <b>7</b>    | 50              | 138.8                                             | 46              | 151.2                                             | 13              | 539.7                                             |
| <b>9</b>    | 7               | 974.9                                             | 13              | 514.7                                             | 5               | 1333.3                                            |
| <b>14</b>   | 41              | 171.0                                             | 21              | 329.7                                             | 16              | 434.6                                             |
| imipramine  | >60             | <115.5                                            | 5               | 1420.5                                            | 16              | 435.5                                             |
| propranolol | >60             | <115.5                                            | 3               | 2387.8                                            | 20              | 373.2                                             |
| terfenadine | 11              | 615.1                                             | 7               | 1053.6                                            | 8               | 851.4                                             |
| verapamil   | 38              | 183.0                                             | 35              | 195.7                                             | 18              | 374.8                                             |

<sup>a</sup> mean of two replicates**Supplementary Table 5.** Metabolic stability<sup>a</sup> in liver S9 fractions

|             | human           |                                                   | rat             |                                                   | mouse           |                                                   |
|-------------|-----------------|---------------------------------------------------|-----------------|---------------------------------------------------|-----------------|---------------------------------------------------|
|             | half-life (min) | $Cl_{int}$ ( $\mu\text{L}/\text{min}/\text{mg}$ ) | half-life (min) | $Cl_{int}$ ( $\mu\text{L}/\text{min}/\text{mg}$ ) | half-life (min) | $Cl_{int}$ ( $\mu\text{L}/\text{min}/\text{mg}$ ) |
| <b>7</b>    | 60              | 38.9                                              | 31              | 75.5                                              | 9               | 266.4                                             |
| <b>9</b>    | 3               | 689.4                                             | 16              | 140.4                                             | 4               | 544.0                                             |
| <b>14</b>   | >60             | <38.5                                             | 17              | 137.5                                             | 18              | 128.4                                             |
| imipramine  | >60             | <38.5                                             | 3               | 886.4                                             | 15              | 153.3                                             |
| propranolol | >60             | <38.5                                             | 3               | 765.7                                             | 6               | 356.6                                             |
| terfenadine | 16.0            | 144.5                                             | 8               | 290.8                                             | 14              | 160.1                                             |
| verapamil   | >60             | <38.5                                             | 31              | 76.1                                              | 18              | 127.0                                             |

<sup>a</sup> mean of n = 2 replicates**Supplementary Table 6.** Pharmacokinetic parameters for compound **7** in mouse plasma following a single IV administration in male ICR mice (dose: 3 mg/kg).

| $t_{1/2}$ (h) | $C_0$ (ng/mL) | $AUC_{last}$ (ng*hr/mL) | $AUC_{inf}$ (ng*hr/mL) | $V_{ss}$ (L/kg) | $Cl$ (mL/min/kg) |
|---------------|---------------|-------------------------|------------------------|-----------------|------------------|
| 0.06          | 63            | 4                       | 5                      | 35.21           | 11047.18         |

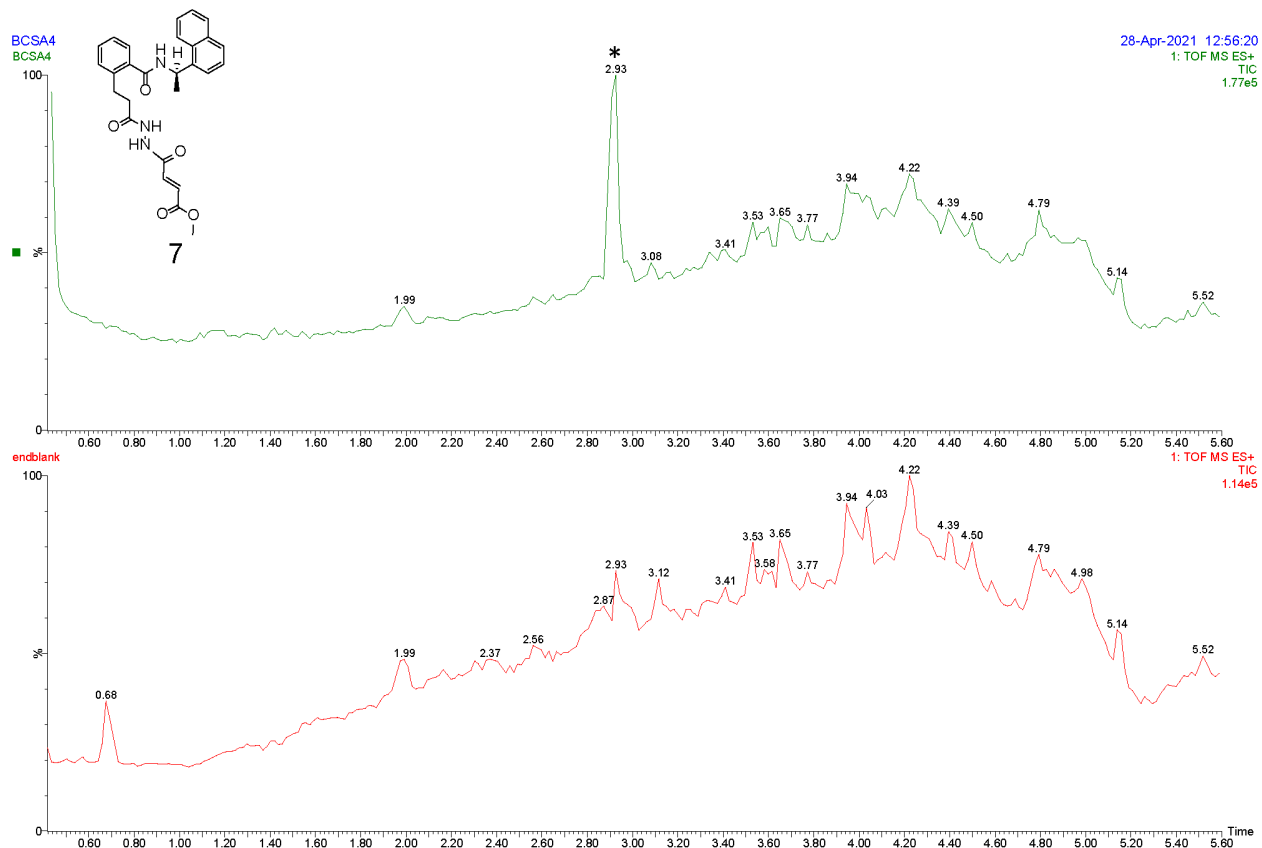

**Supplementary Figure 13.** LC/MS chromatogram of 7. The top chromatogram (green) is the sample, and the bottom (red) is the background.

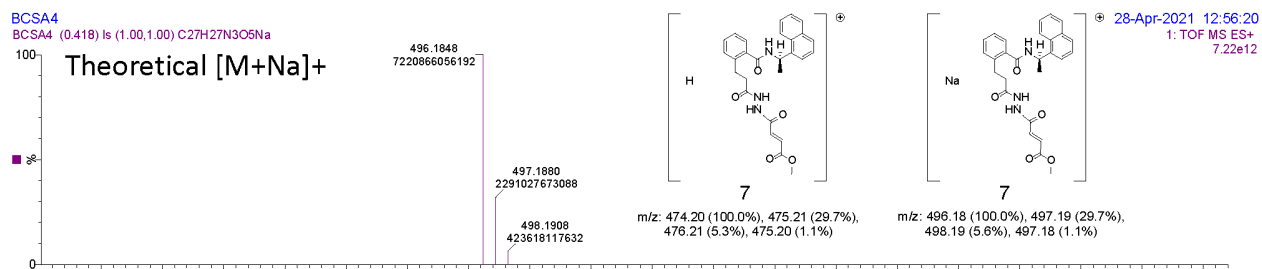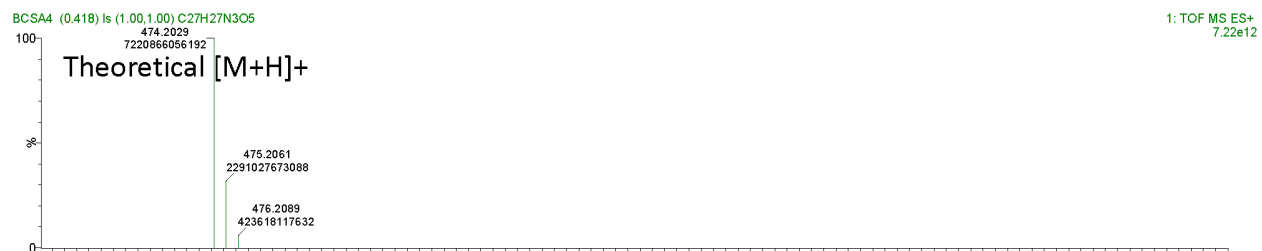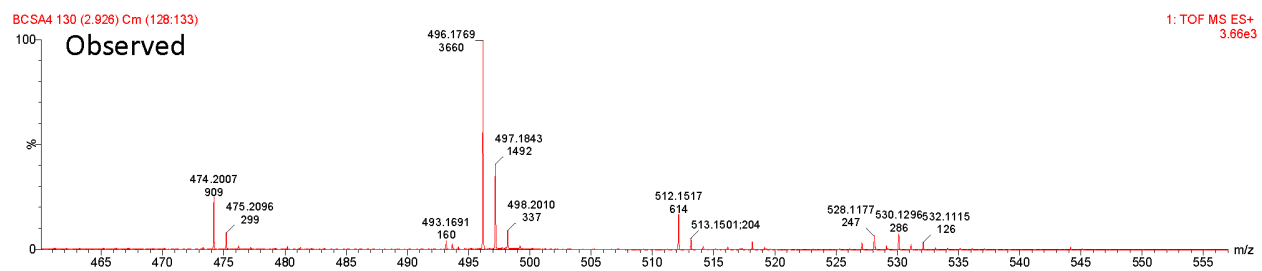

Supplementary Figure 14. HRMS of 7.

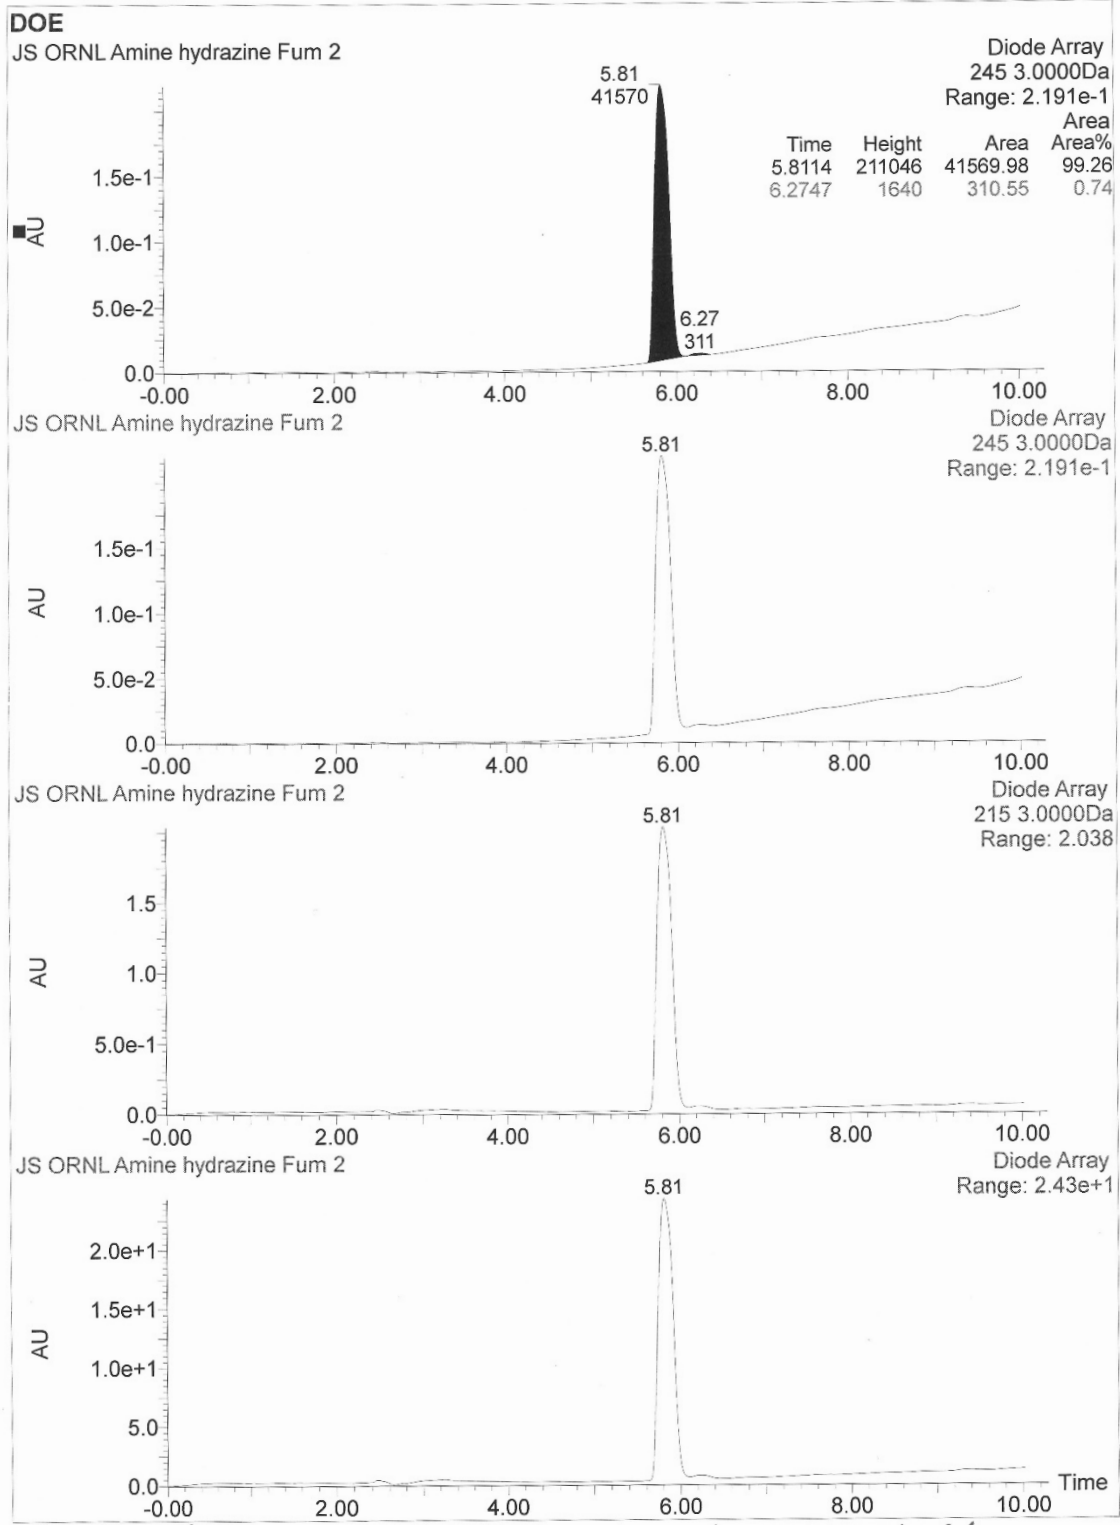

Waters X Select CSH  
C18 5μM VS 4.6 x 150

H<sub>2</sub>O/ACN 90/10 → 0/100 in 10min 1ml/min

Supplementary Figure 15. HPLC chromatogram of 7.

Thermo LTQ XL

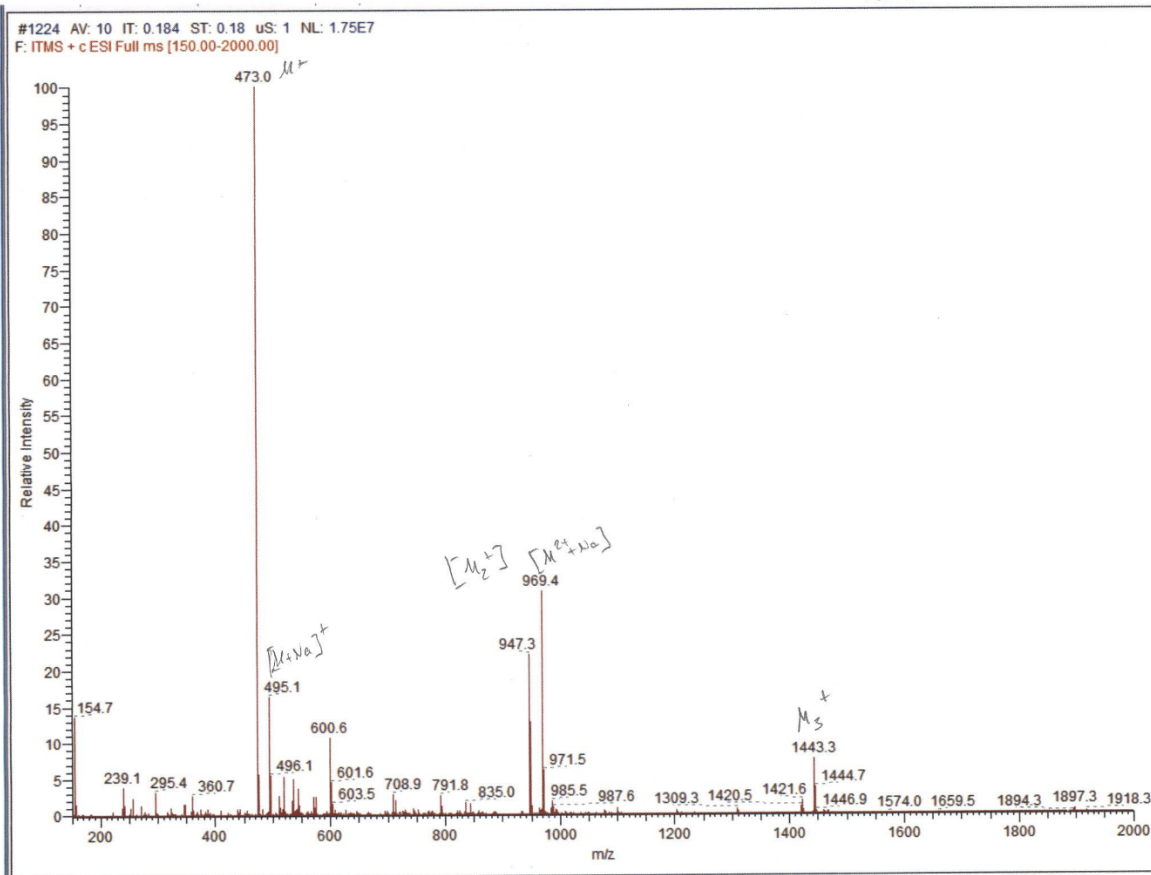

Supplementary Figure 16. LRMS of 7.

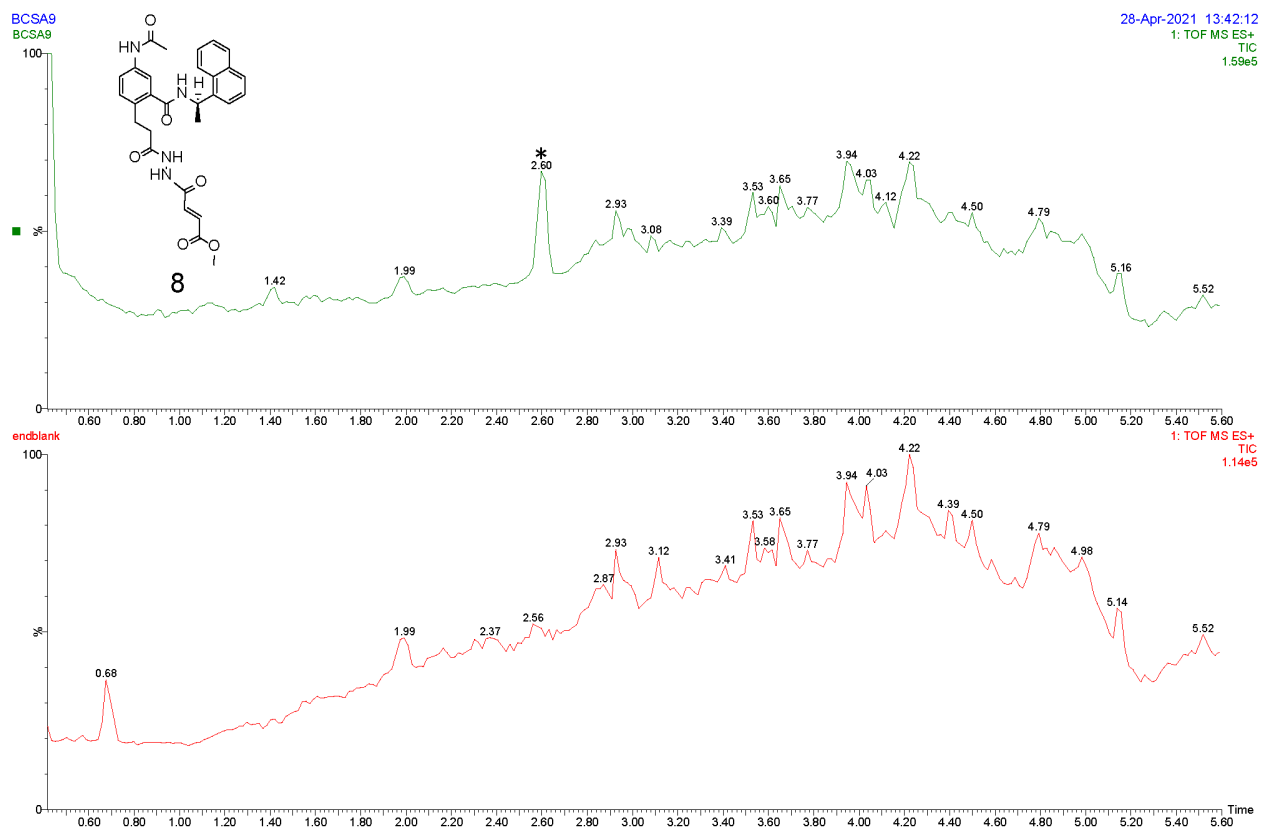

**Supplementary Figure 17.** LC/MS chromatogram of **8**. The top chromatogram (green) is the sample, and the bottom (red) is the background.

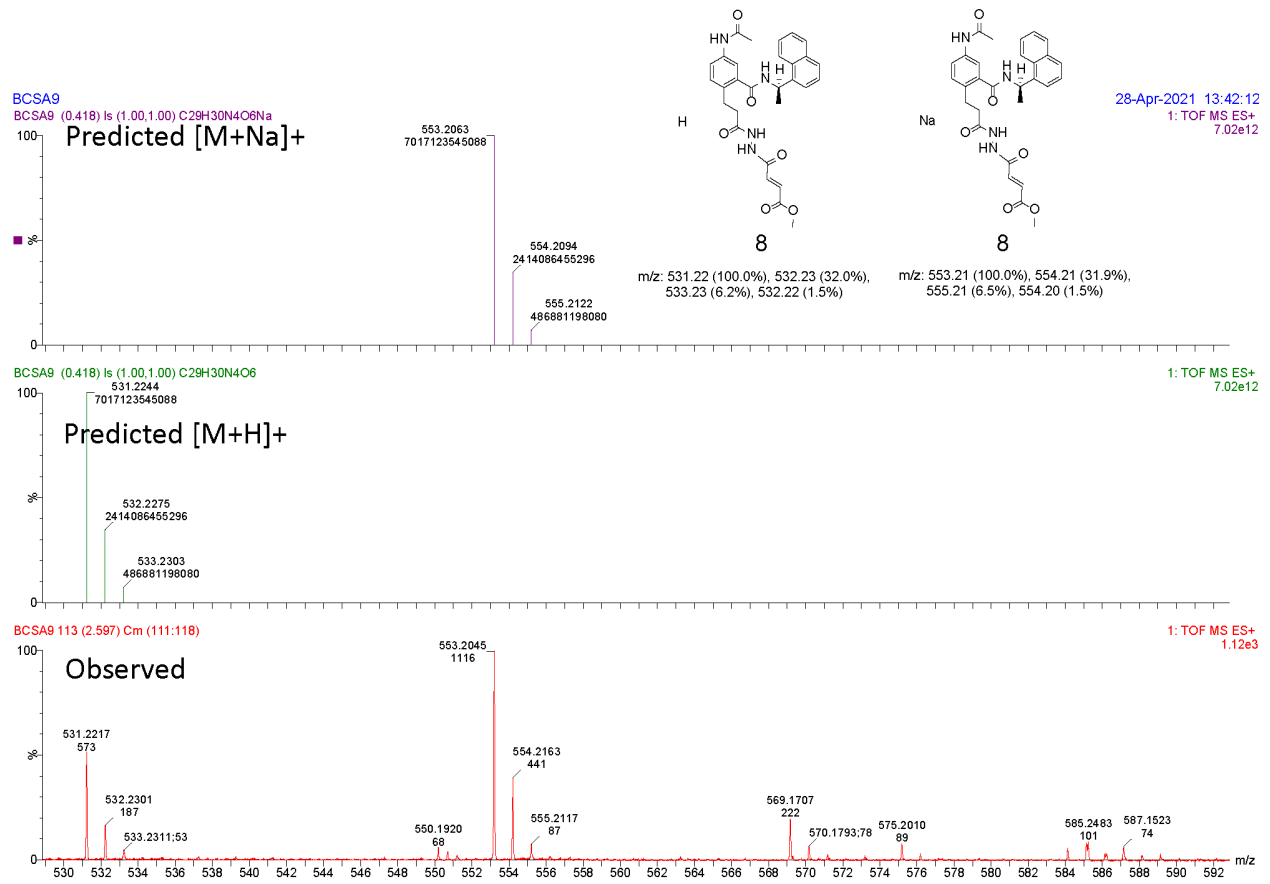

Supplementary Figure 18. HRMS of 8.

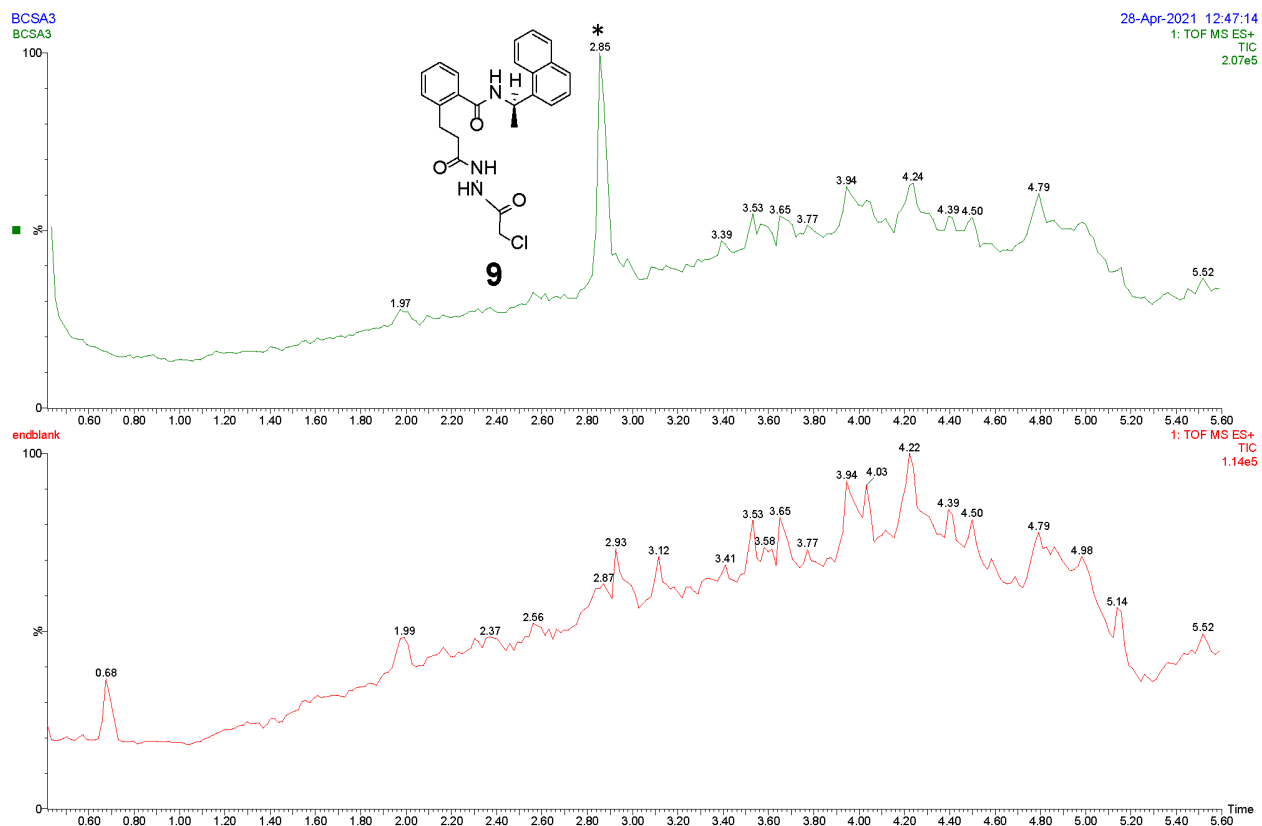

**Supplementary Figure 19.** LC/MS chromatogram of **9**. The top chromatogram (green) is the sample, and the bottom (red) is the background.



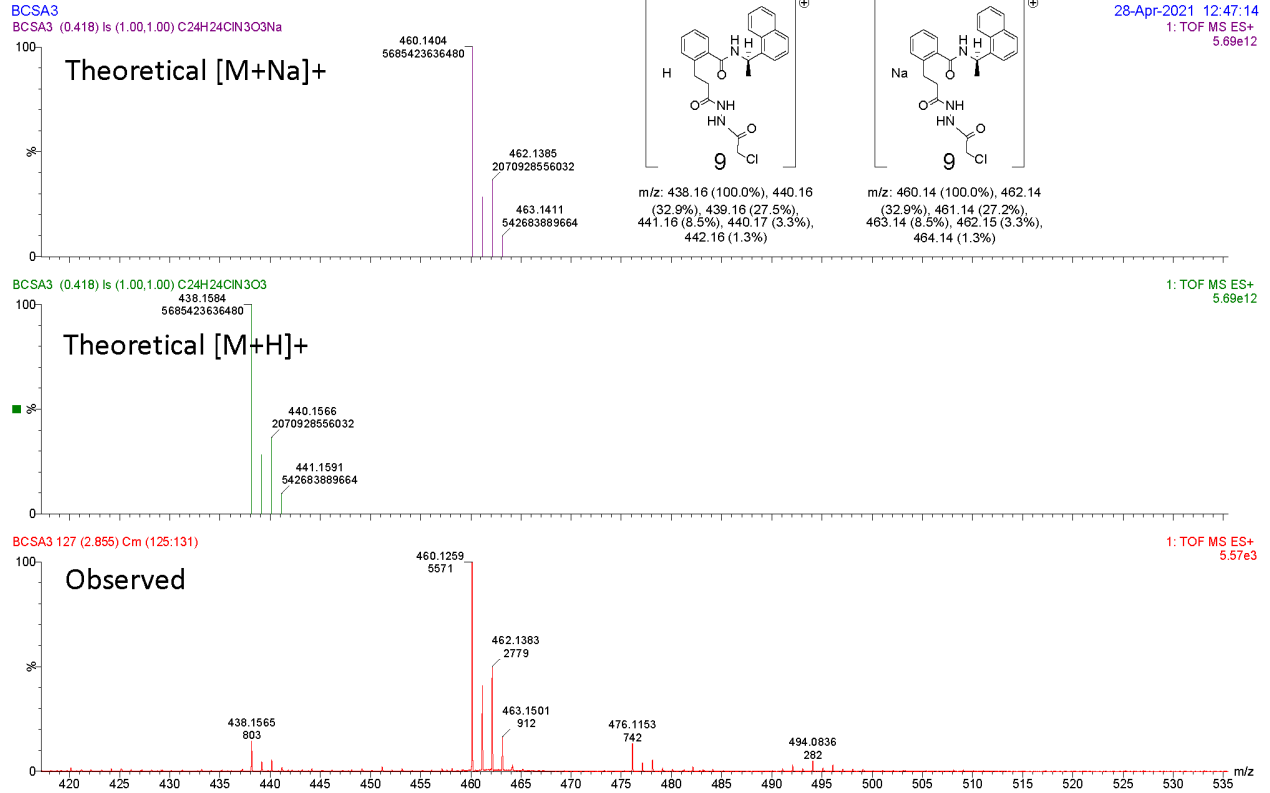

Supplementary Figure 20. HRMS of 9.

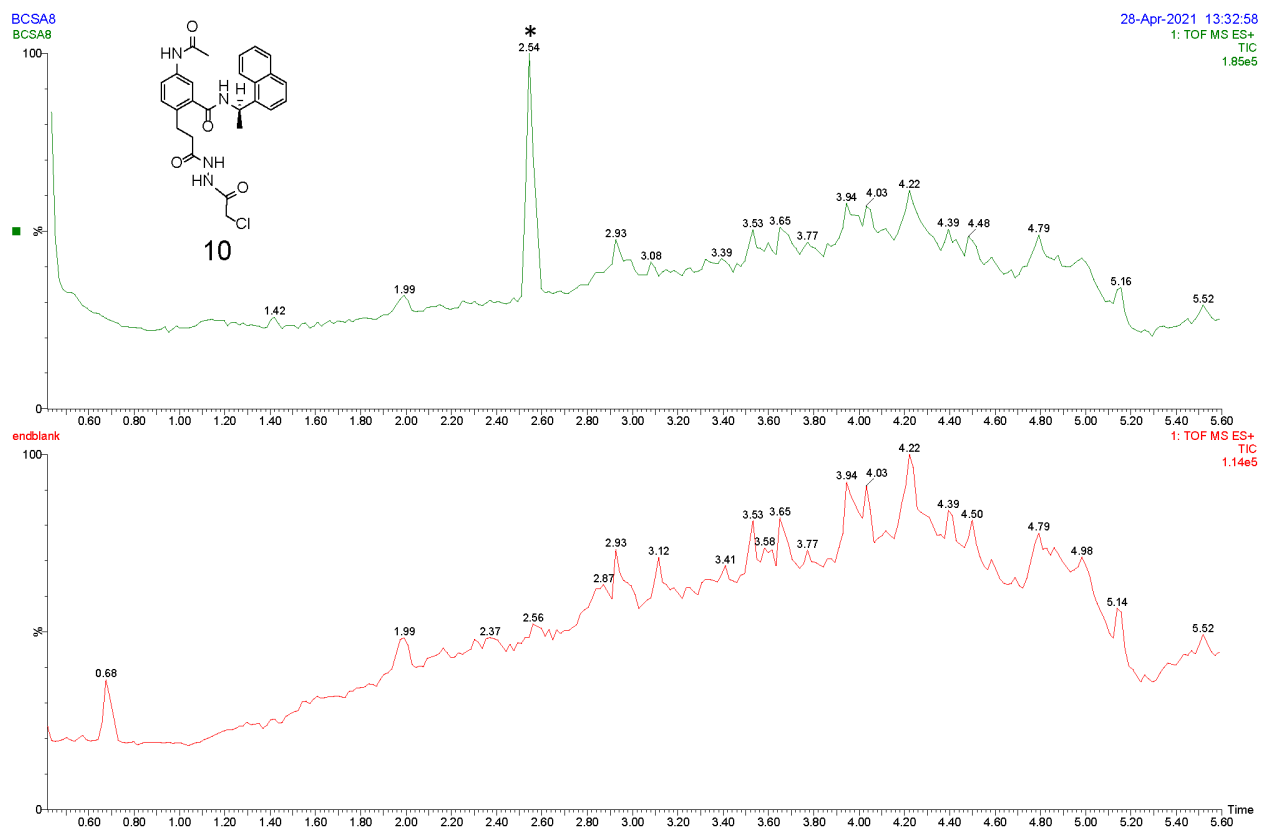

**Supplementary Figure 21.** LC/MS chromatogram of **10**. The top chromatogram (green) is the sample, and the bottom (red) is the background.

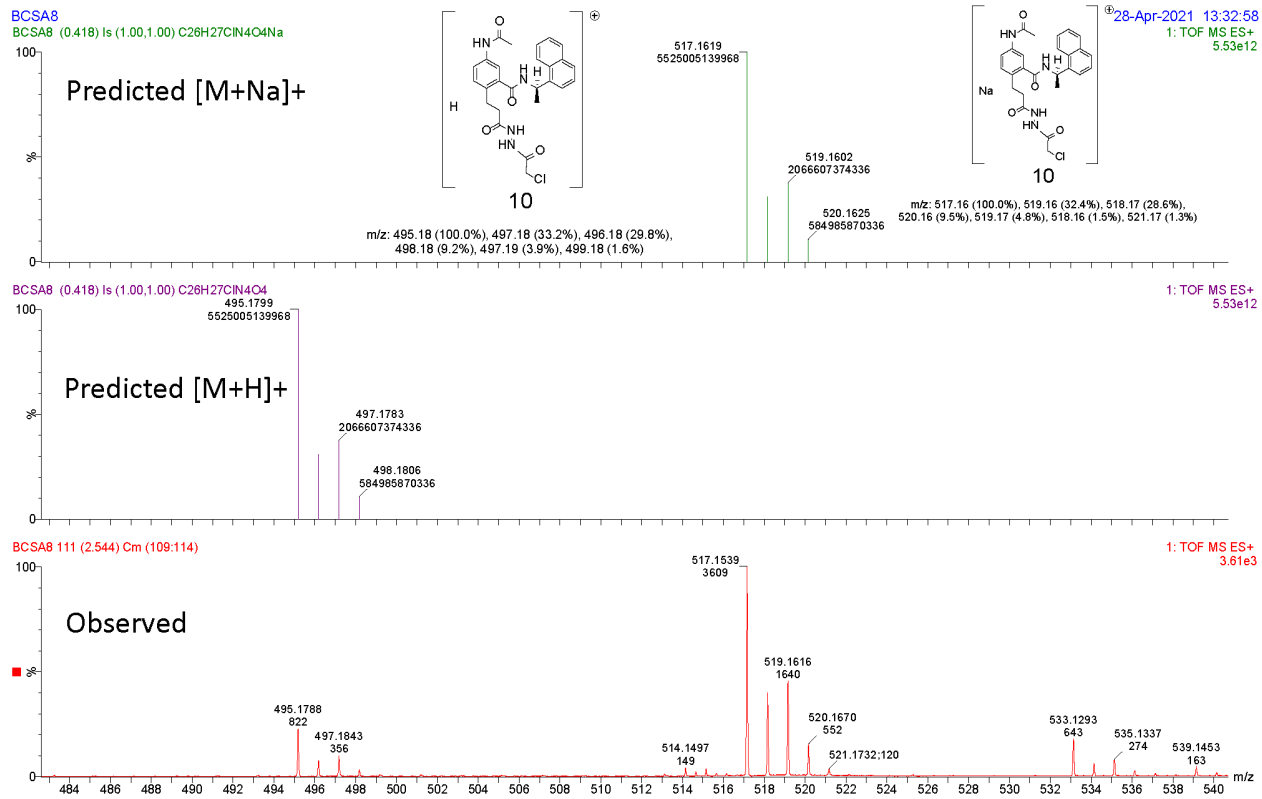

Supplementary Figure 22. HRMS of 10.

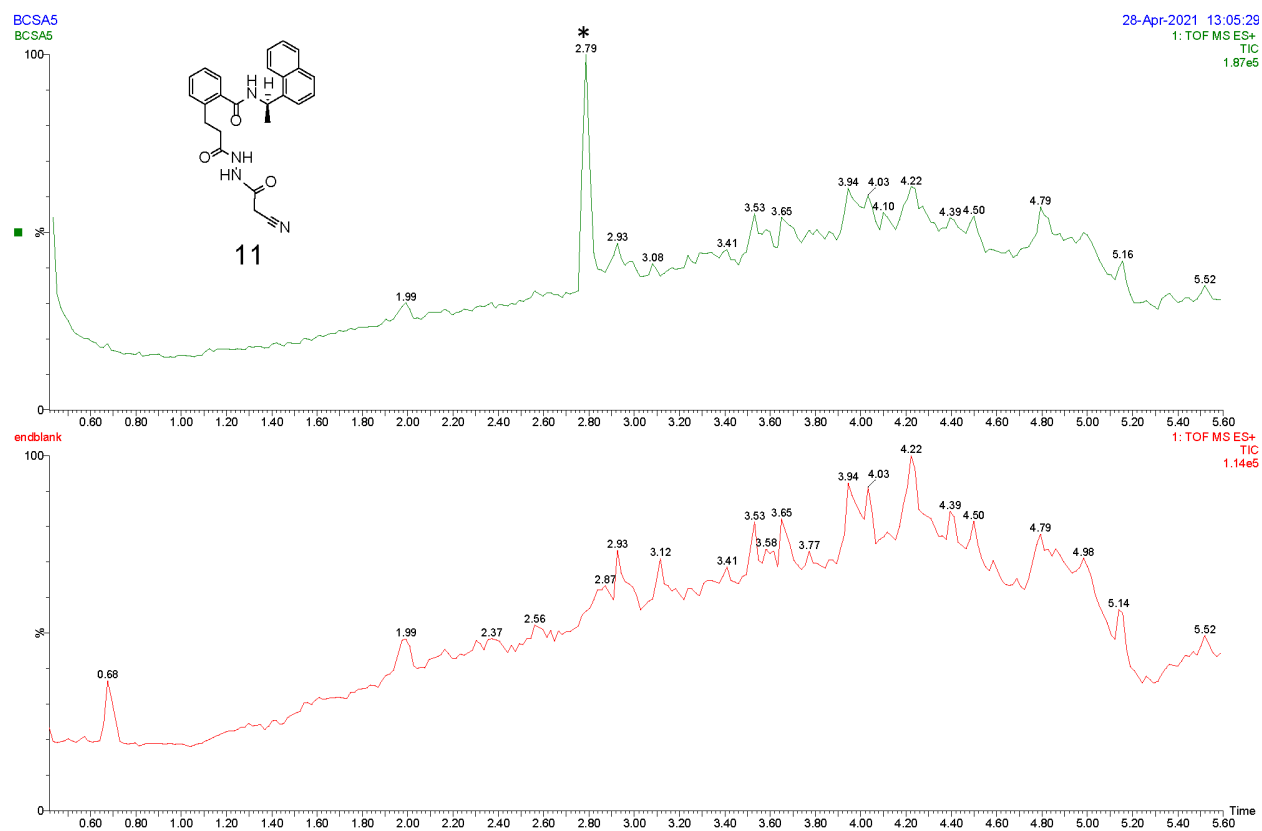

**Supplementary Figure 23.** LC/MS chromatogram of **11**. The top chromatogram (green) is the sample, and the bottom (red) is the background.

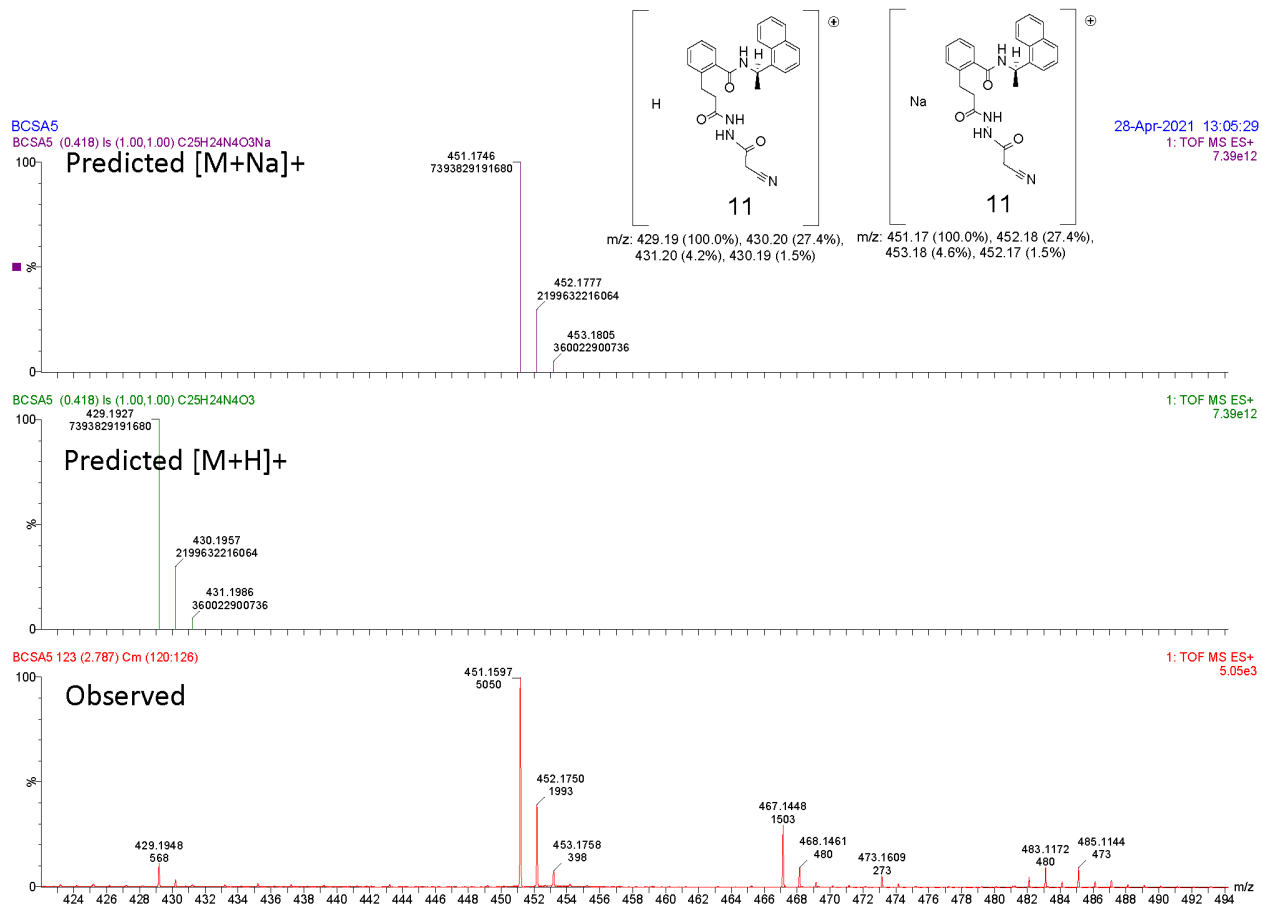

Supplementary Figure 24. HRMS of 11.

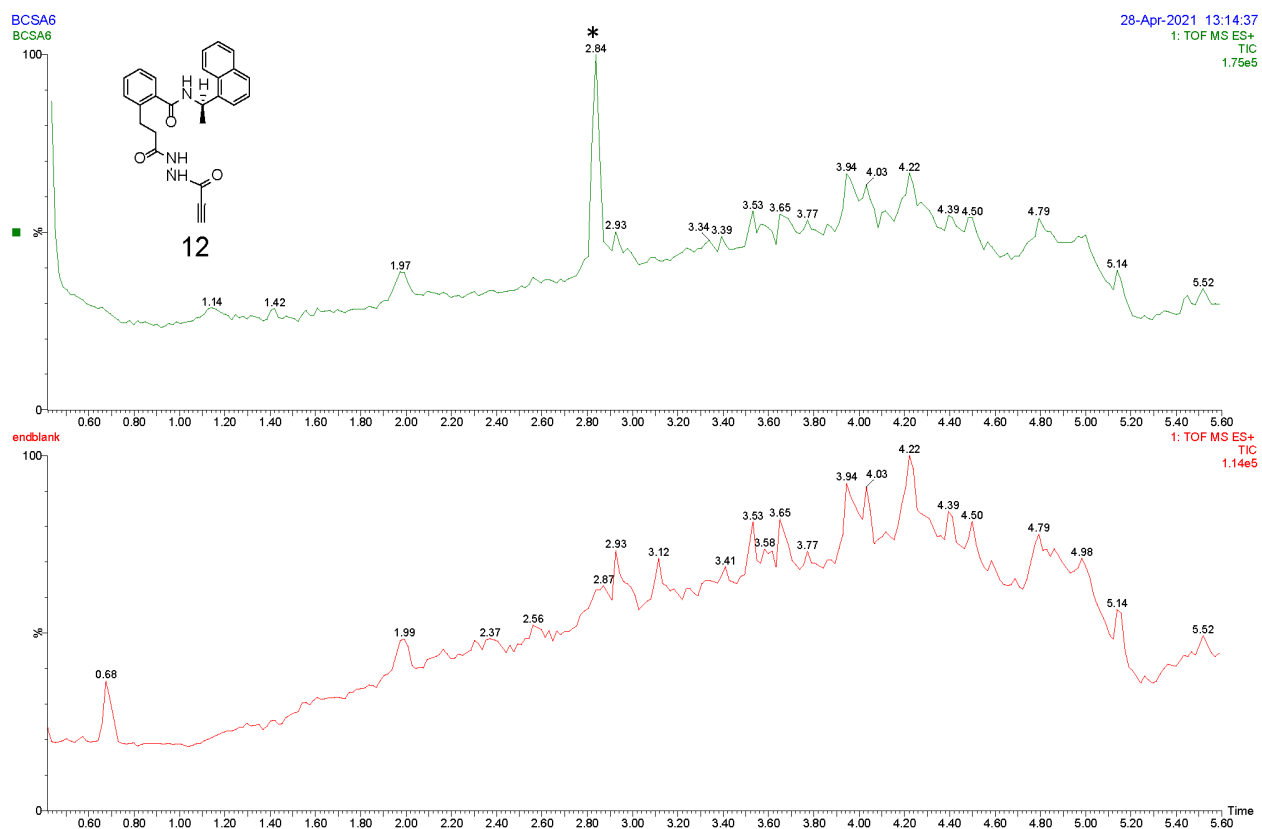

**Supplementary Figure 25.** LC/MS chromatogram of **12**. The top chromatogram (green) is the sample, and the bottom (red) is the background.

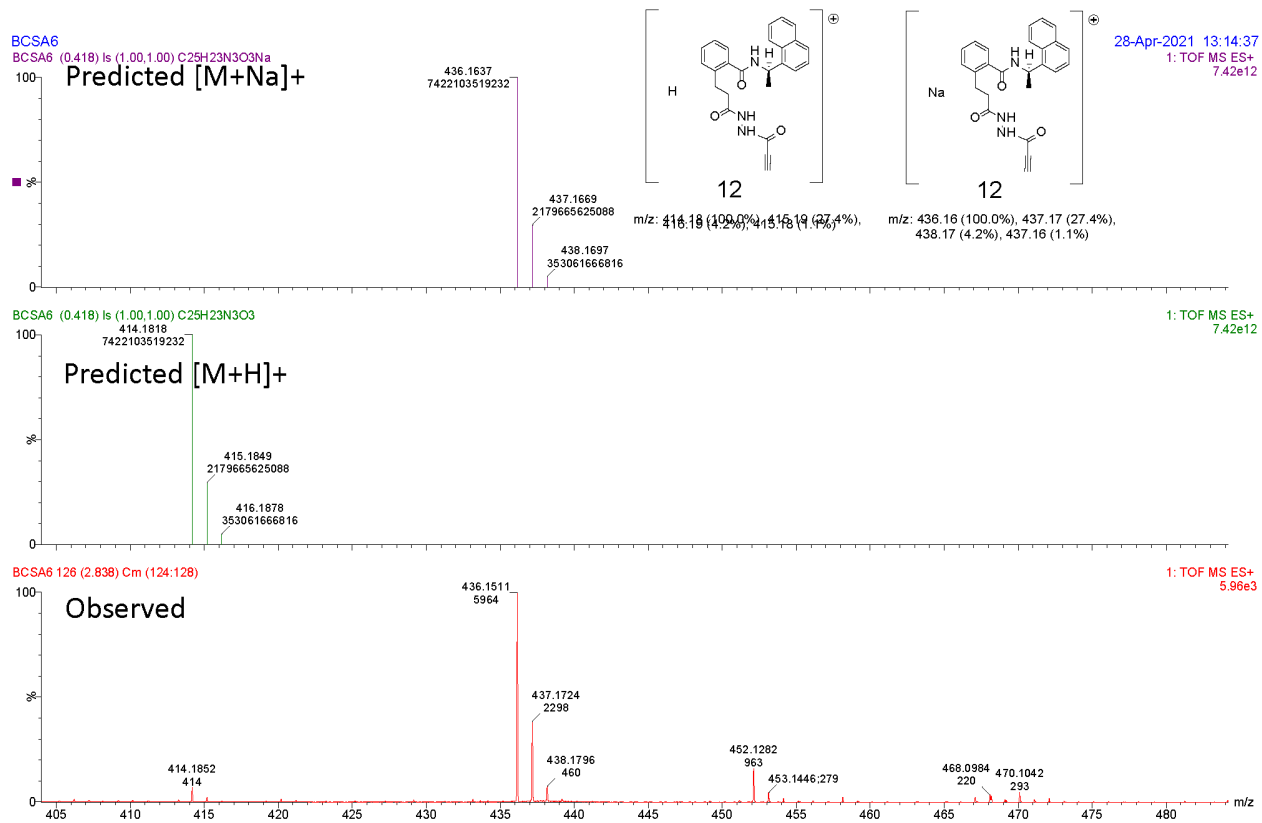

Supplementary Figure 26. HRMS of 12.

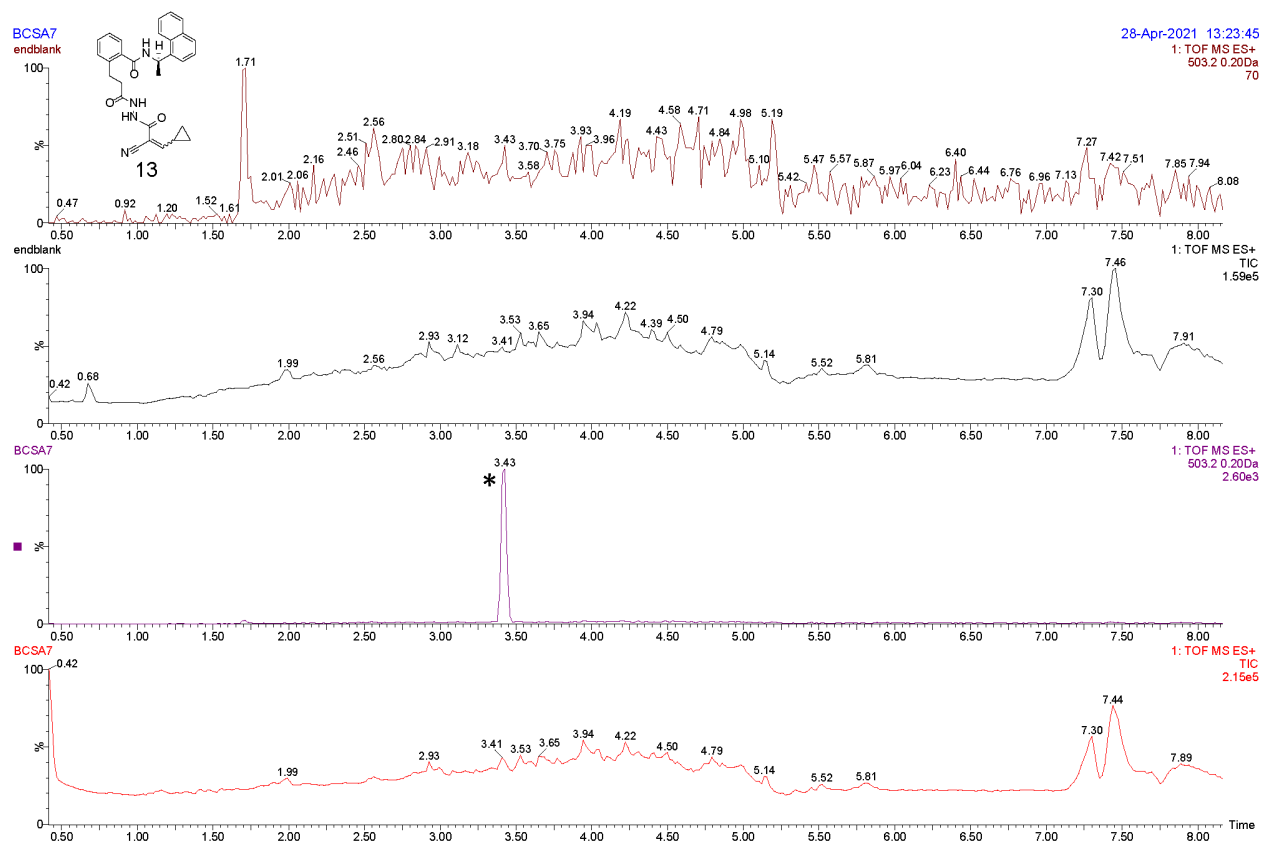

**Supplementary Figure 27.** LC/MS chromatogram of **13**. The top two chromatograms (burgundy and black) are the backgrounds and the bottom two (purple and red) are samples.



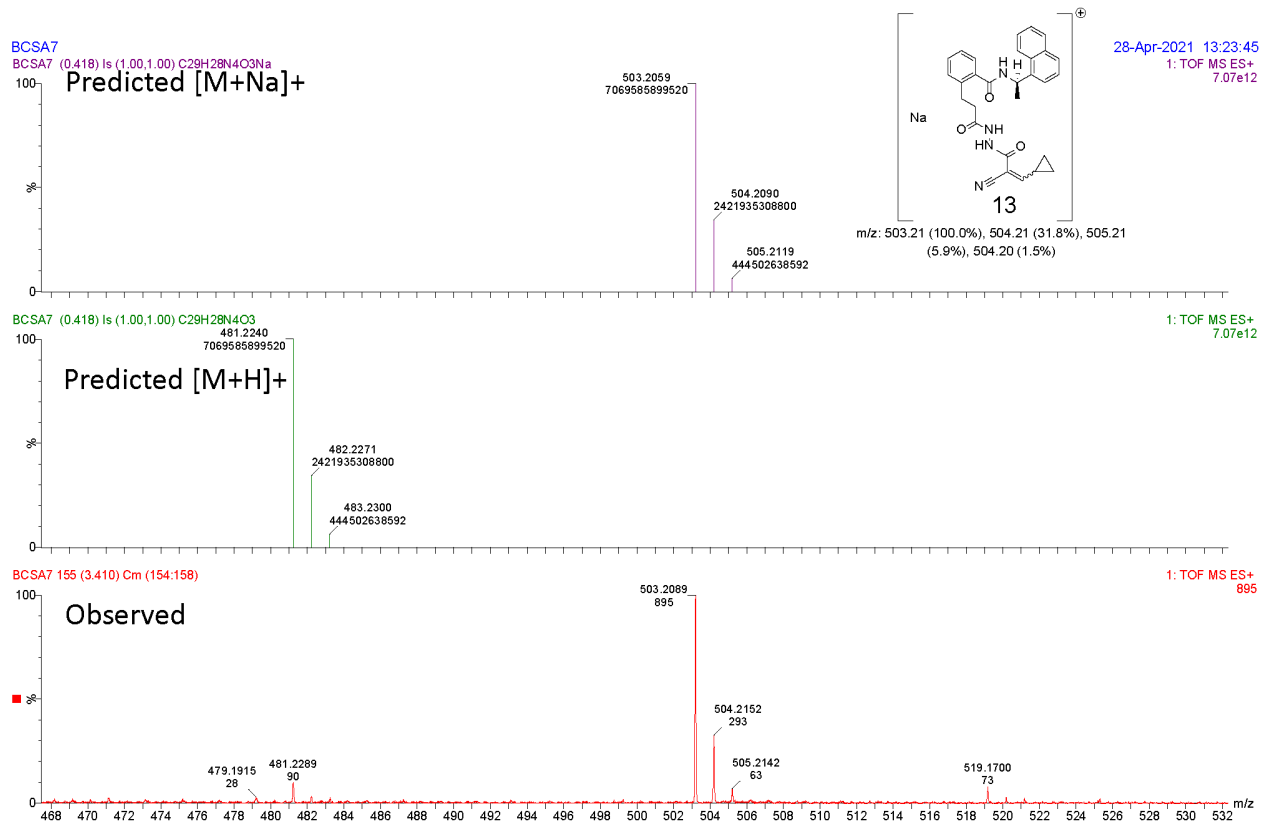

Supplementary Figure 28. HRMS of 13.

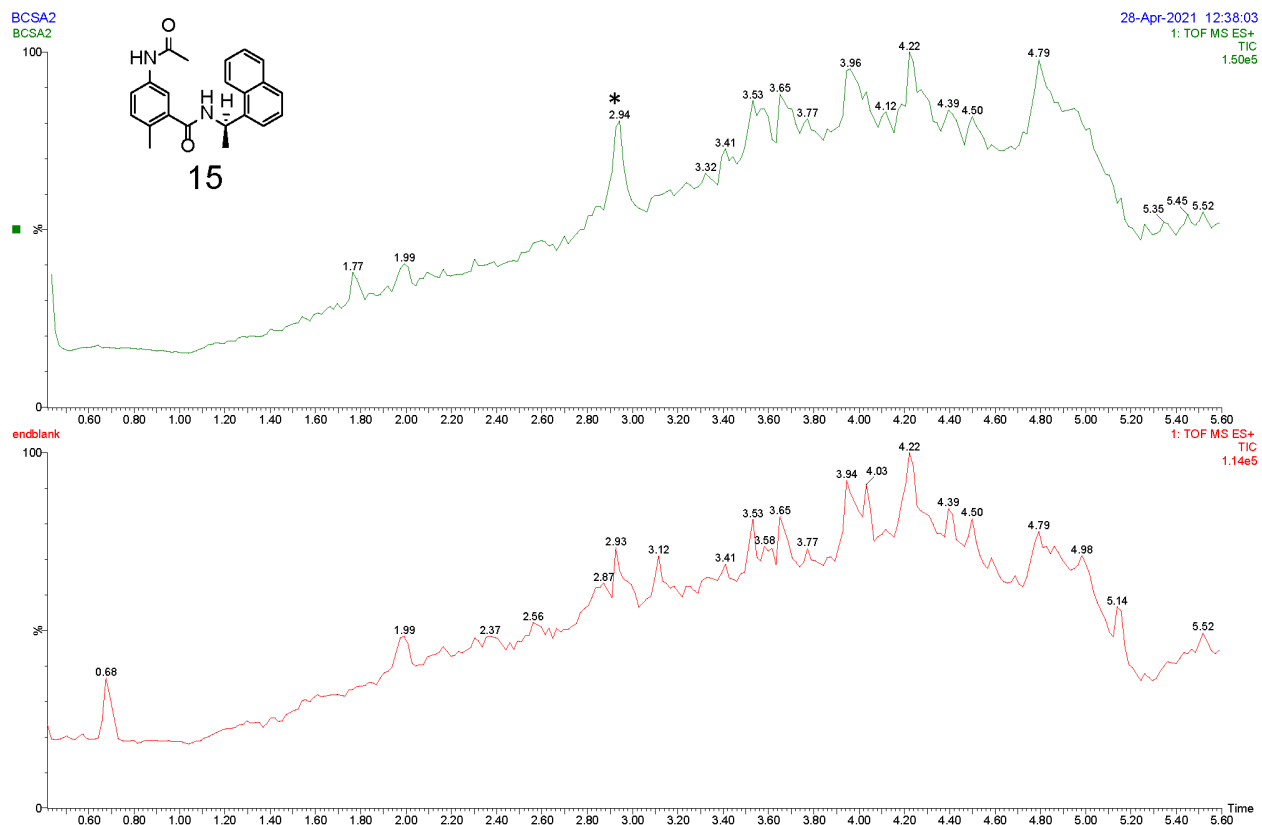

**Supplementary Figure 29.** LC/MS chromatogram of **15**. The top chromatogram (green) is the sample, and the bottom (red) is the background.

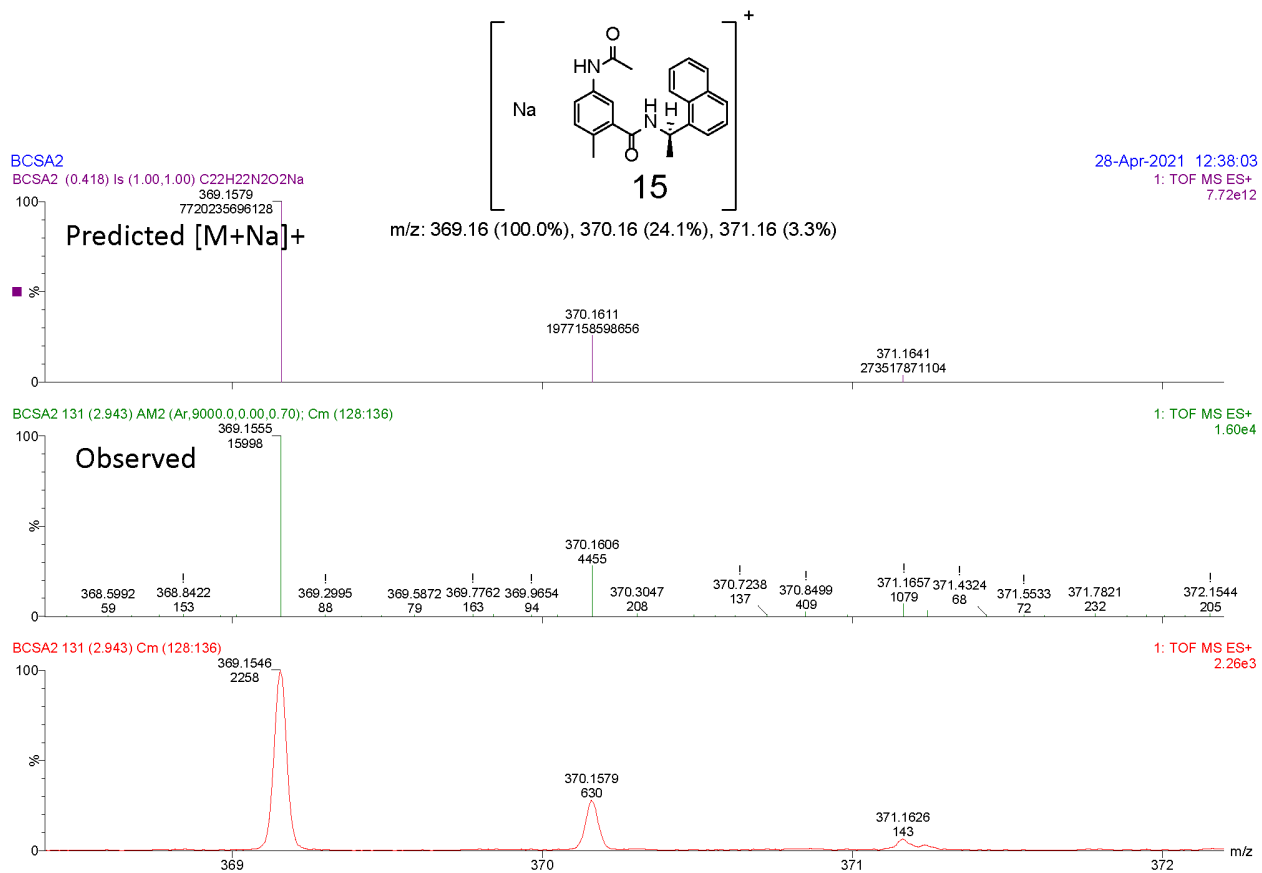

**Supplementary Figure 30 HRMS of 15.**

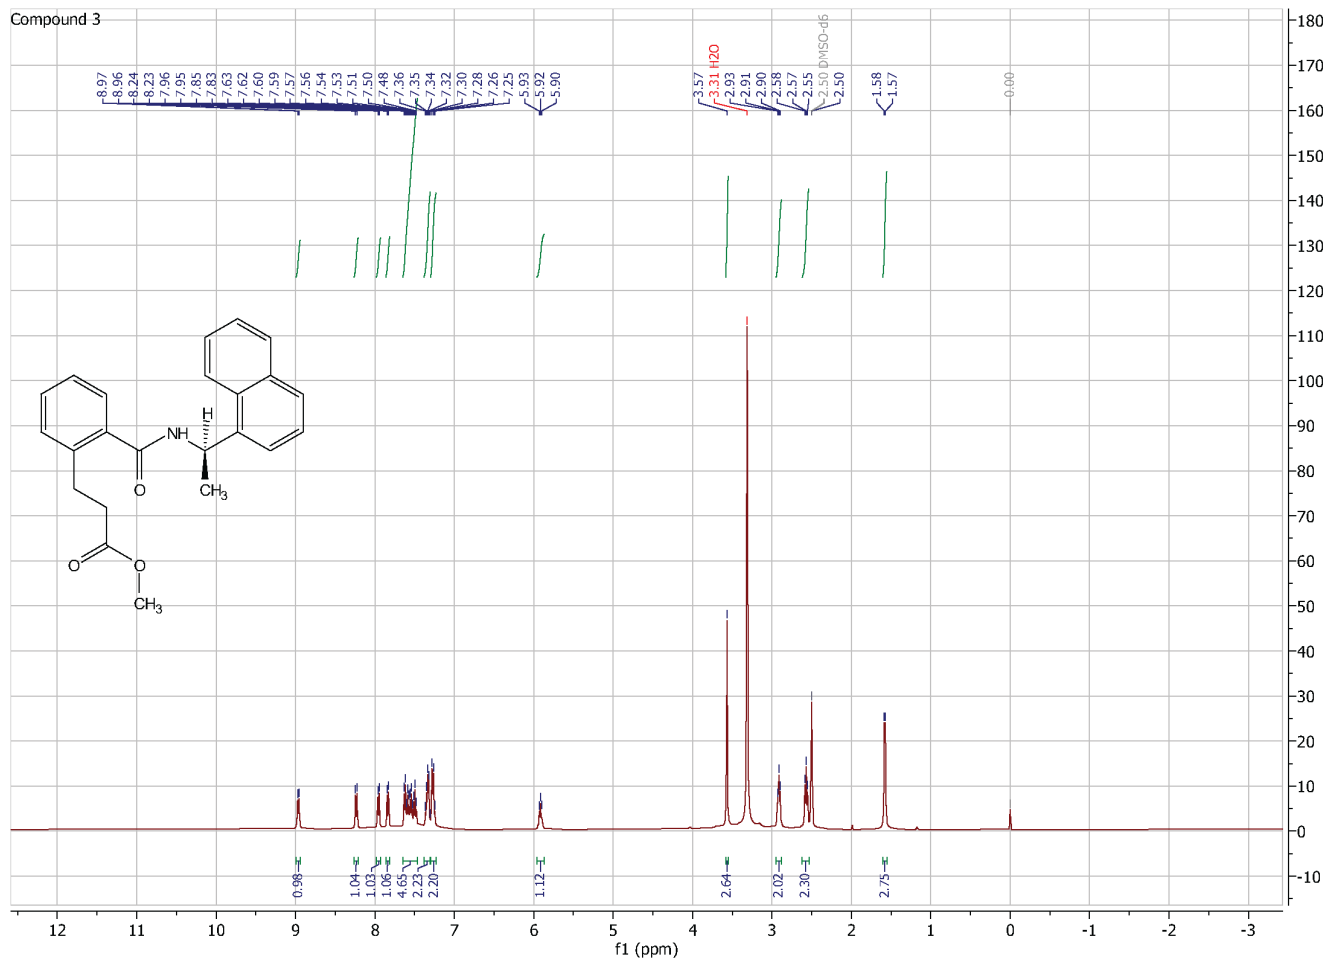

Supplementary Figure 31. <sup>1</sup>H NMR spectrum of 3.

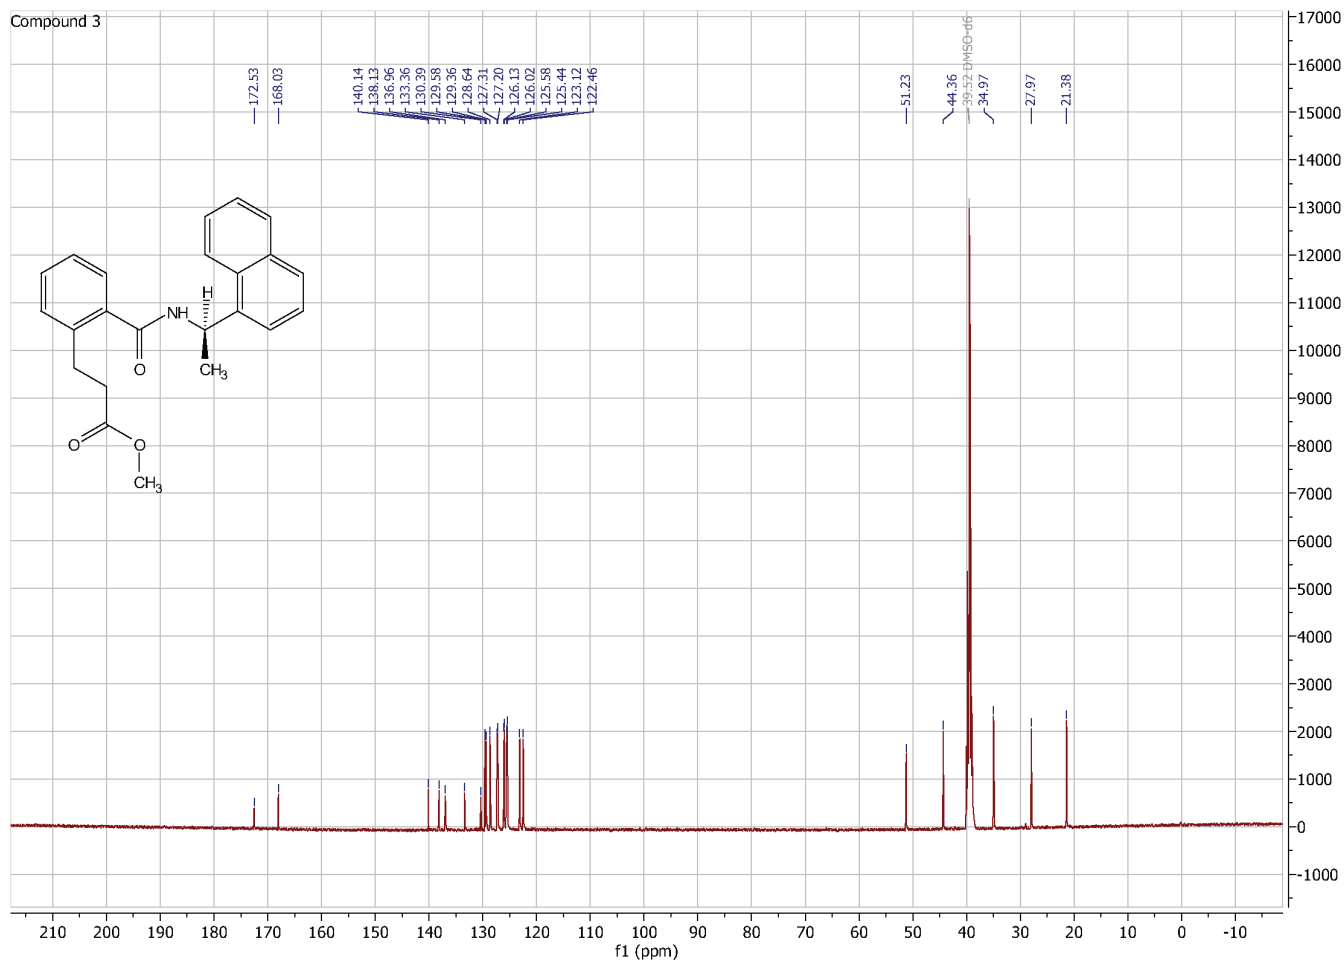

Supplementary Figure 32.  $^{13}\text{C}$  NMR spectrum of 3.

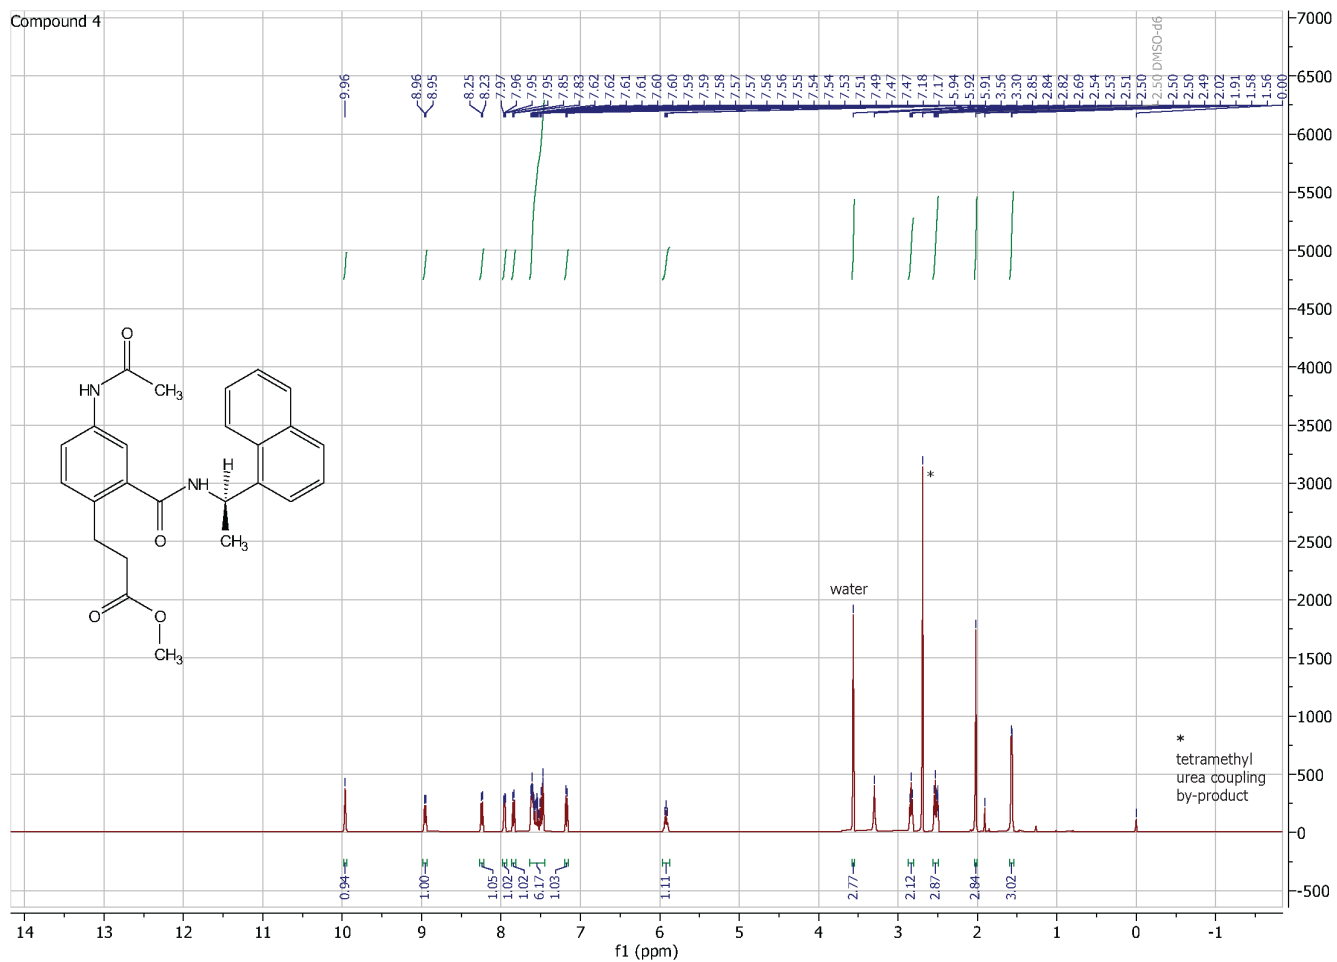

Supplementary Figure 33. <sup>1</sup>H NMR spectrum of 4.

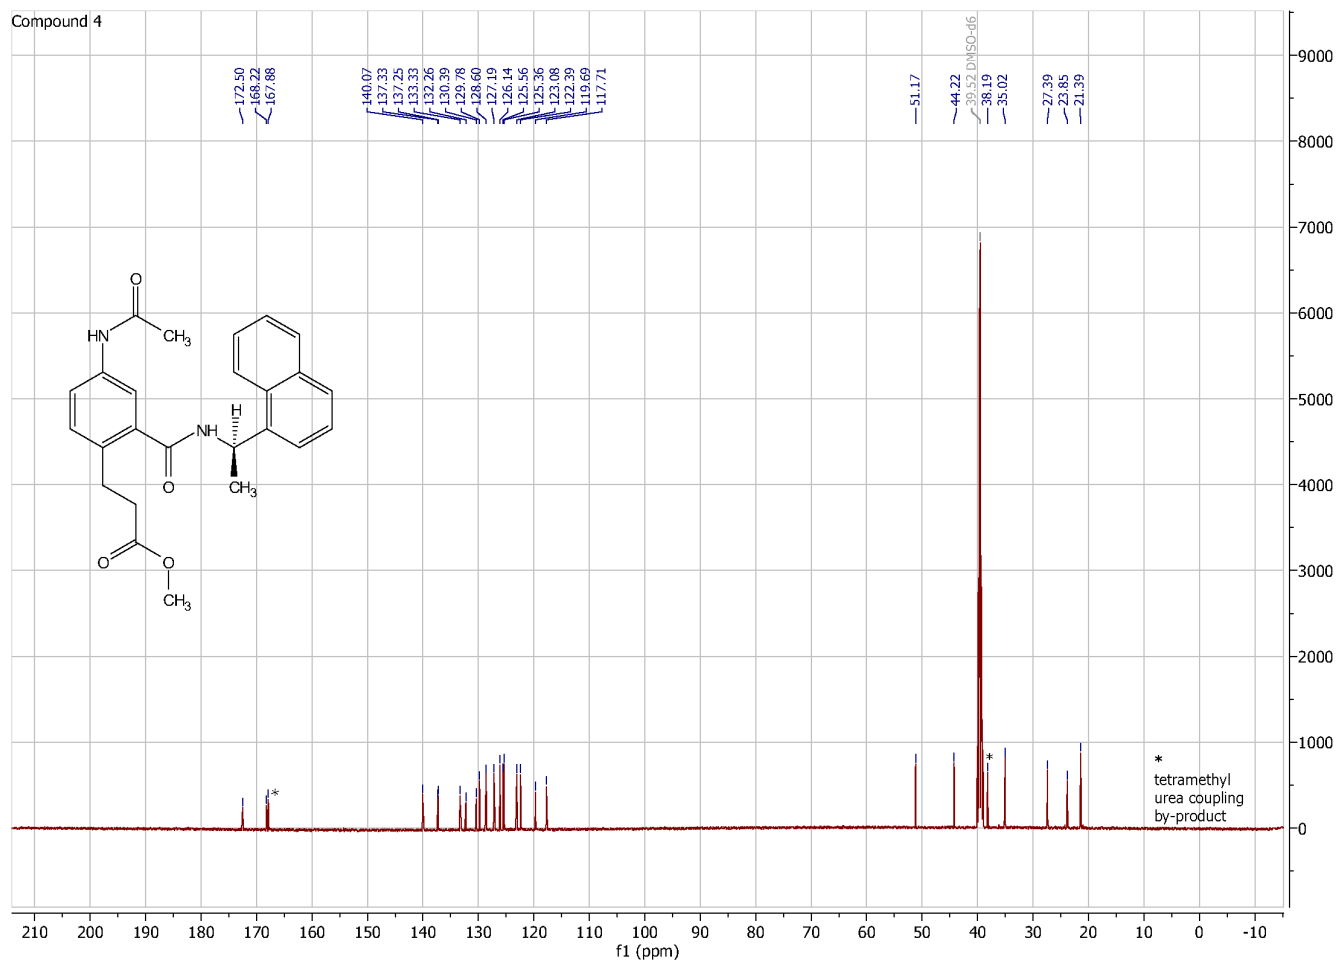

Supplementary Figure 34. <sup>13</sup>C NMR spectrum of 4.

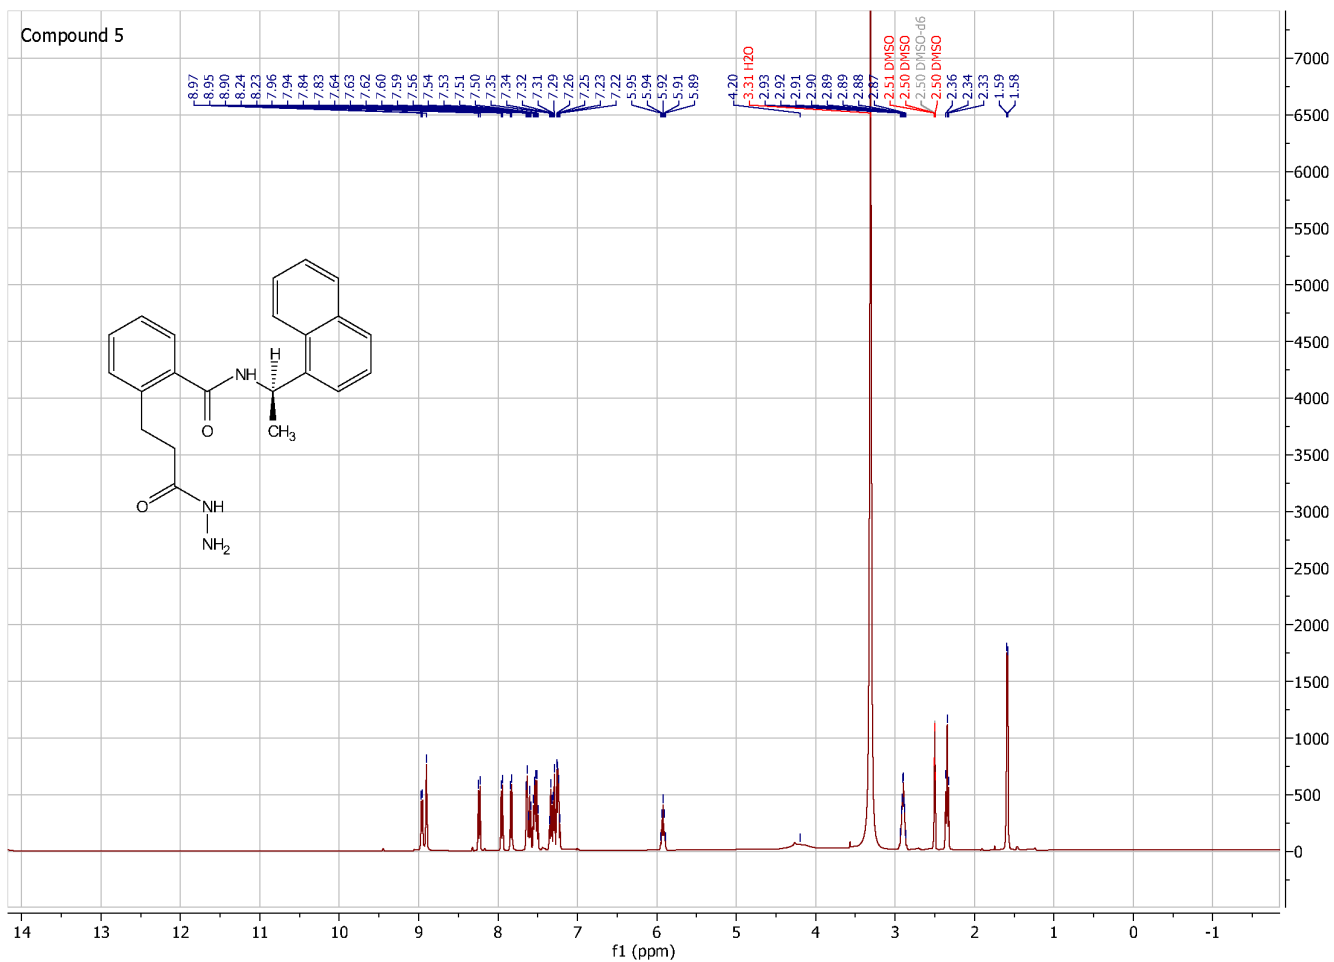

Supplementary Figure 35. <sup>1</sup>H NMR spectrum of 5.



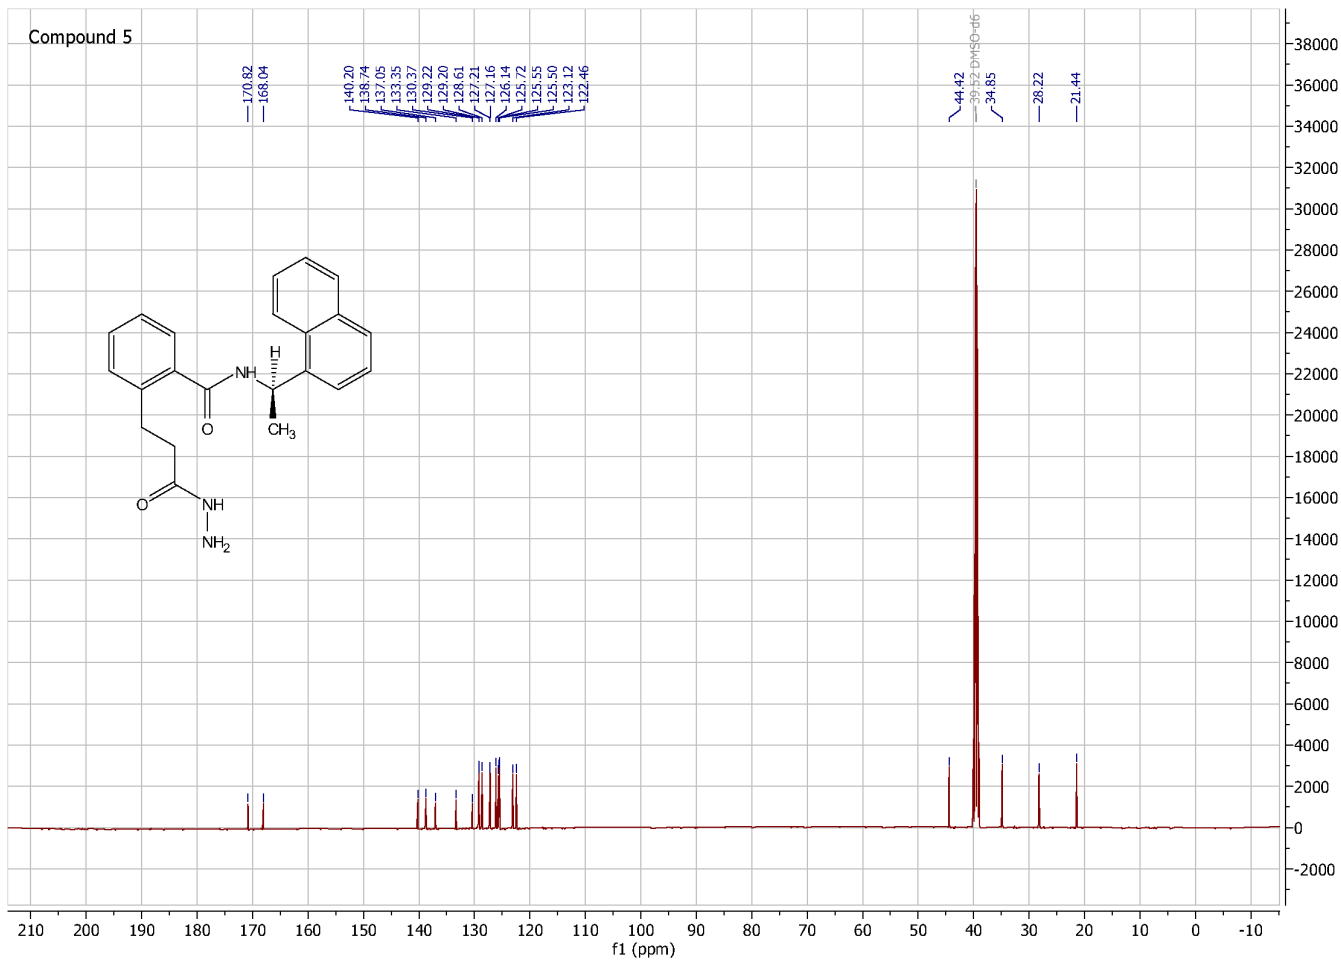

Supplementary Figure 36.  $^{13}\text{C}$  NMR spectrum of 5.

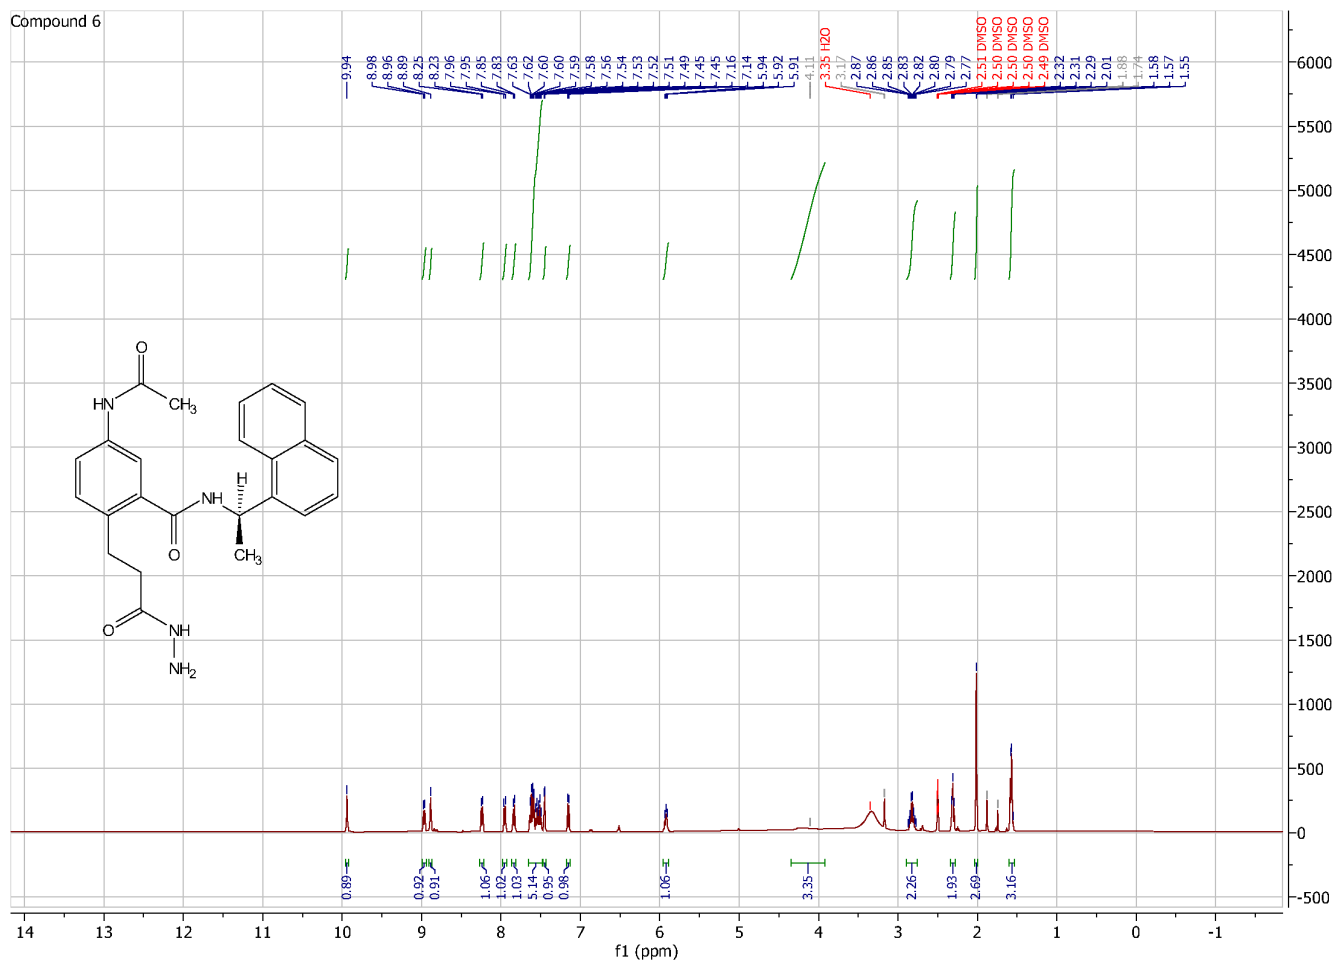

Supplementary Figure 37. <sup>1</sup>H NMR spectrum of 6.

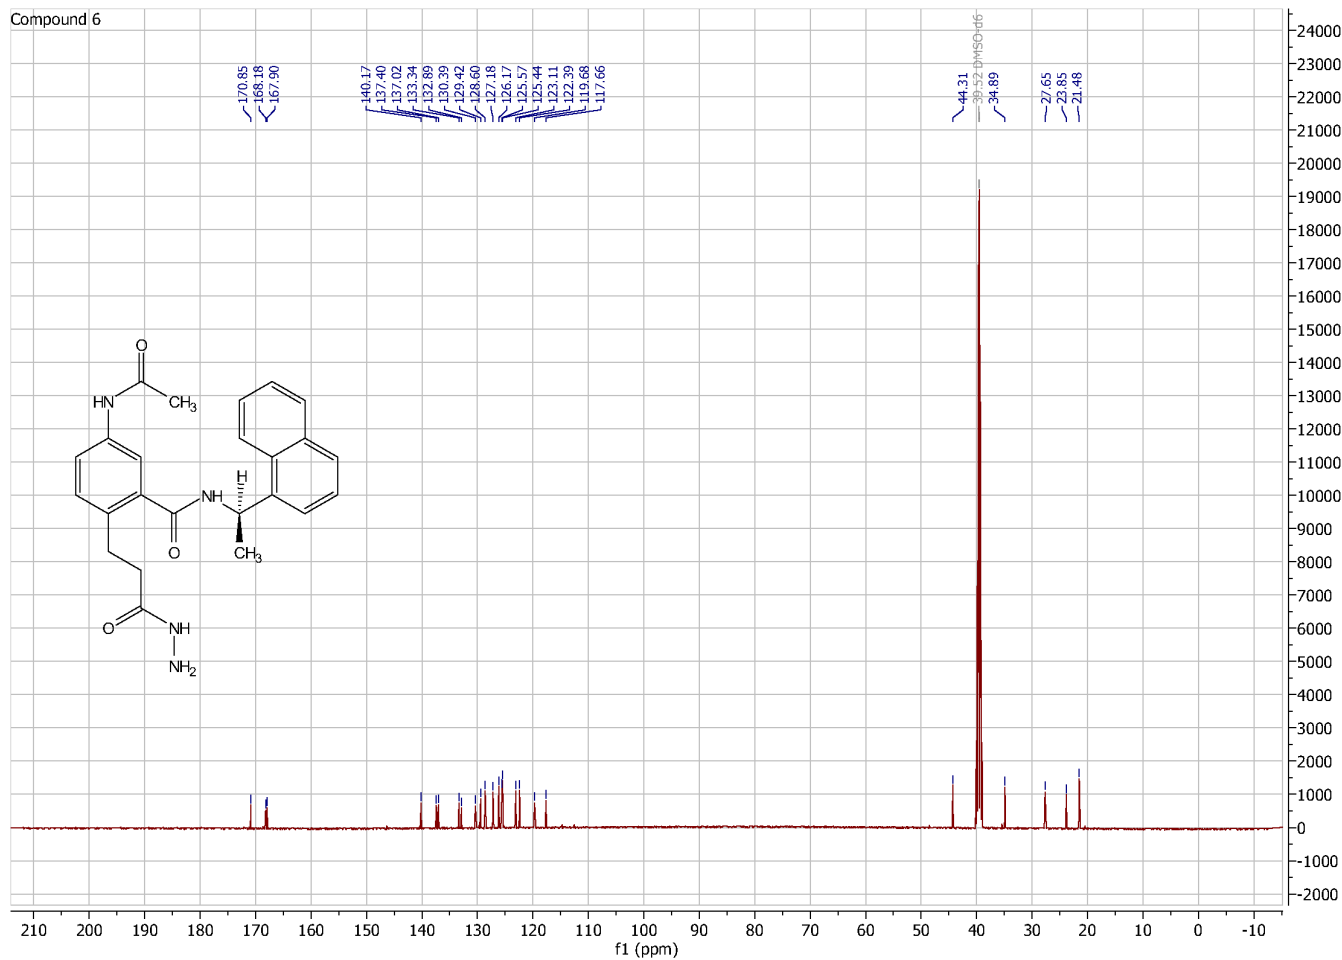

Supplementary Figure 38.  $^{13}\text{C}$  NMR spectrum of 6.

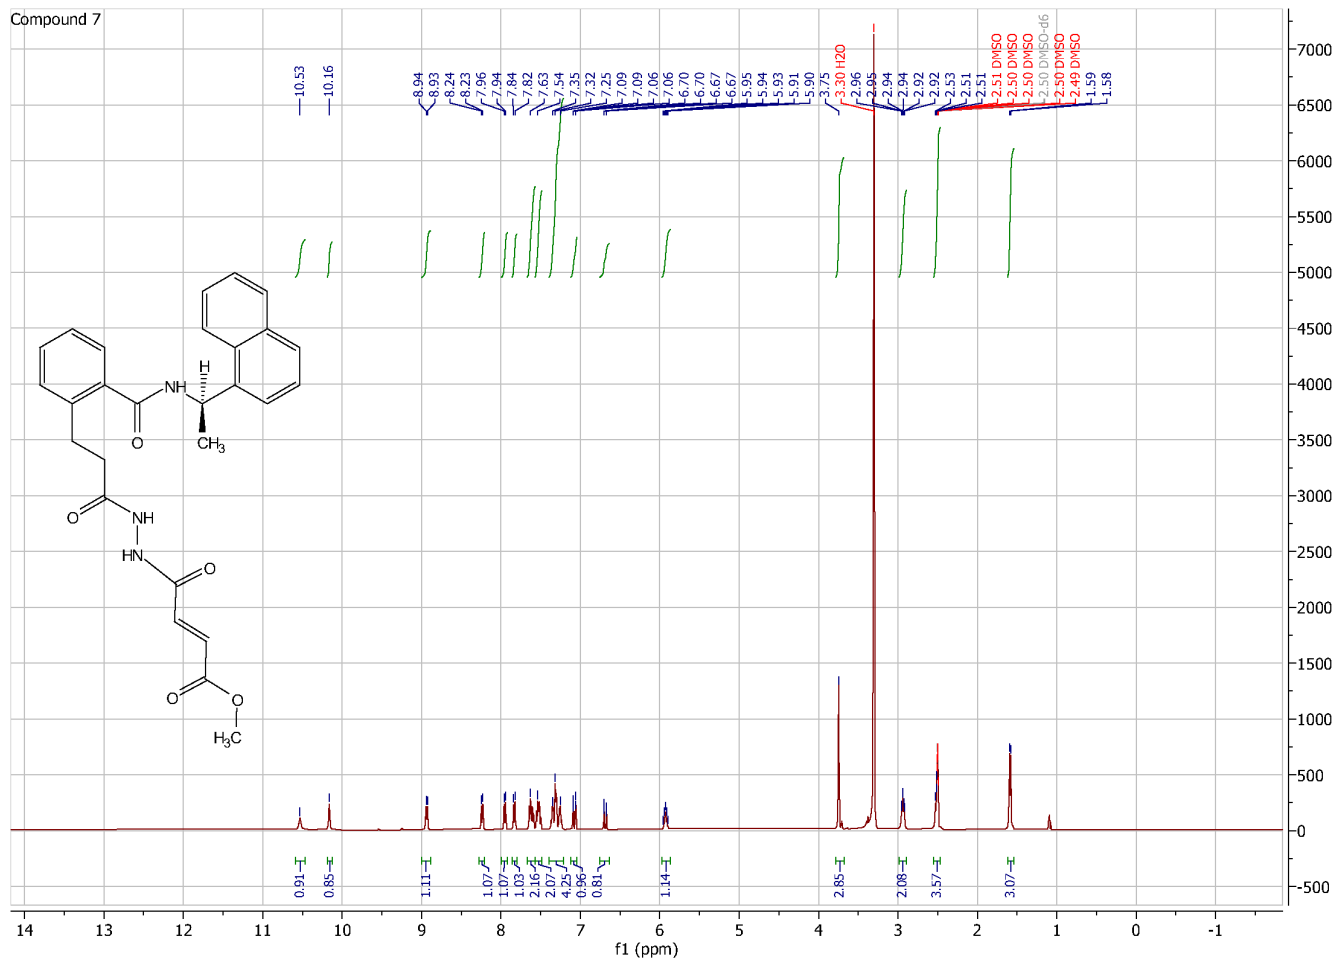

Supplementary Figure 39. <sup>1</sup>H NMR spectrum of 7.

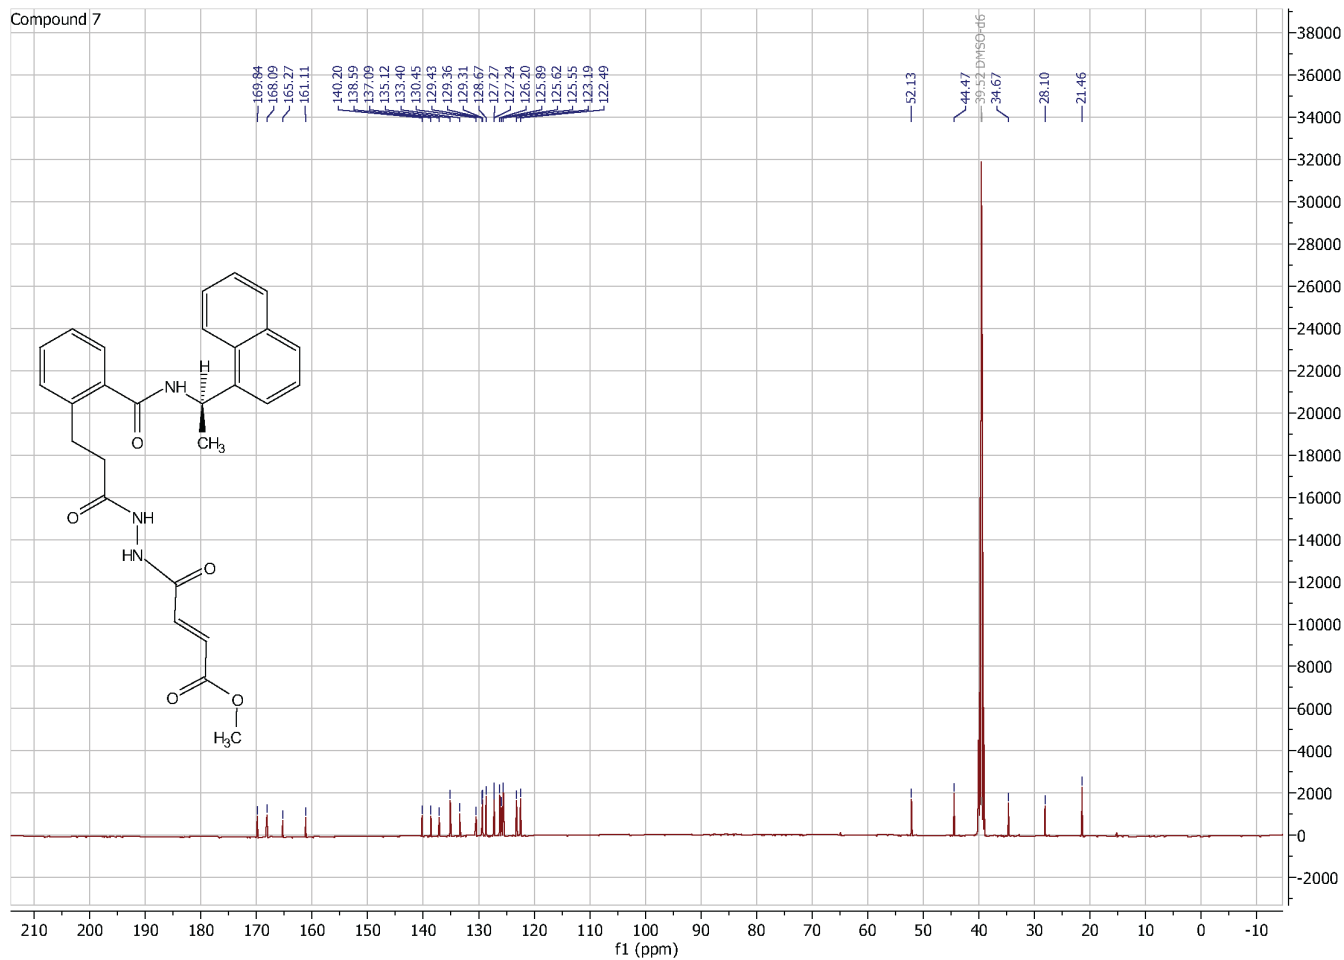

Supplementary Figure 40.  $^{13}\text{C}$  NMR spectrum of 7

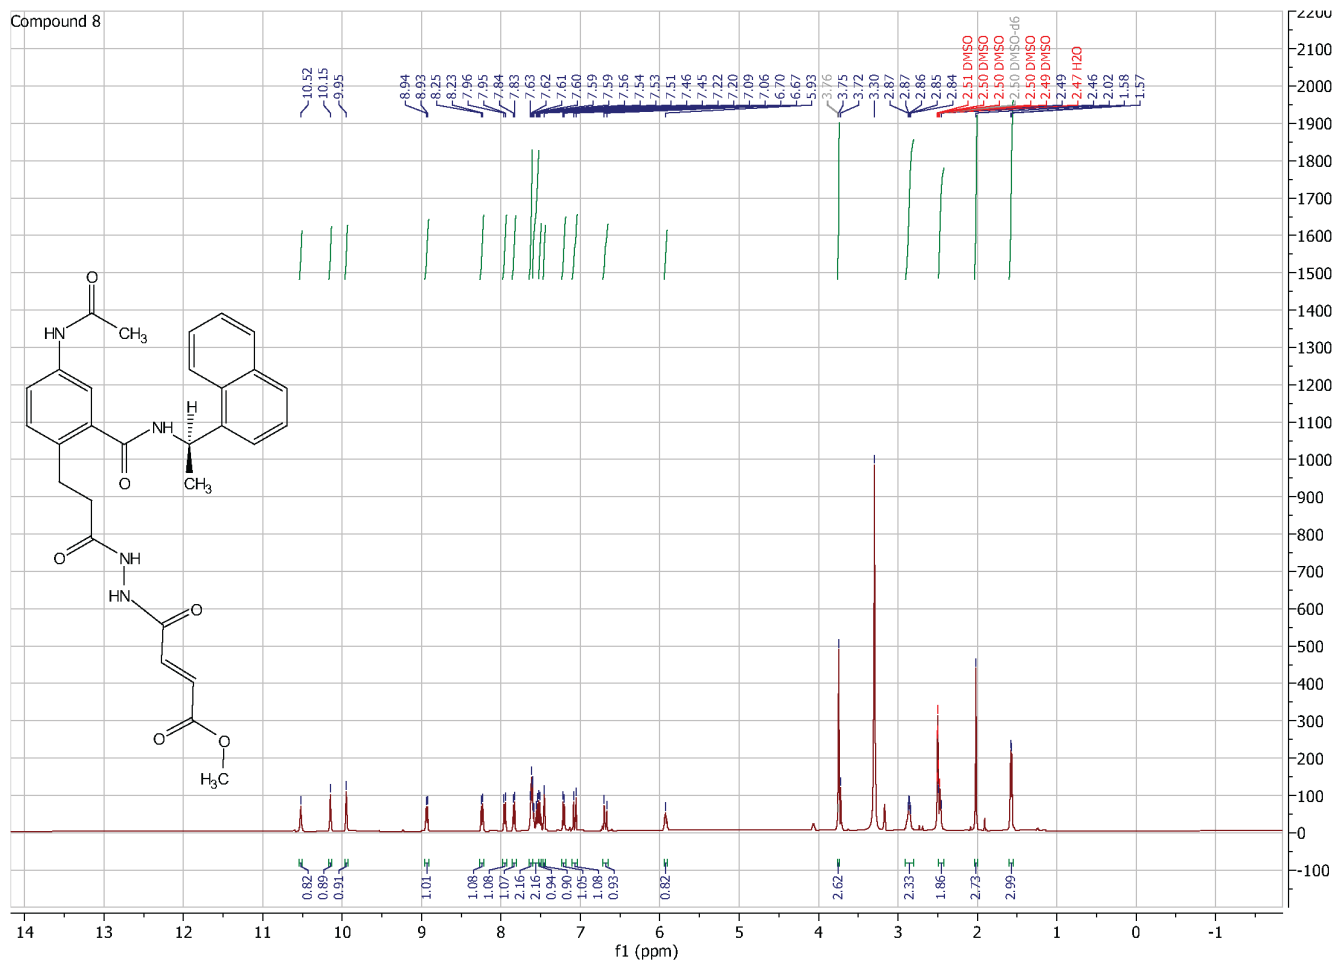

Supplementary Figure 41. <sup>1</sup>H NMR spectrum of 8.

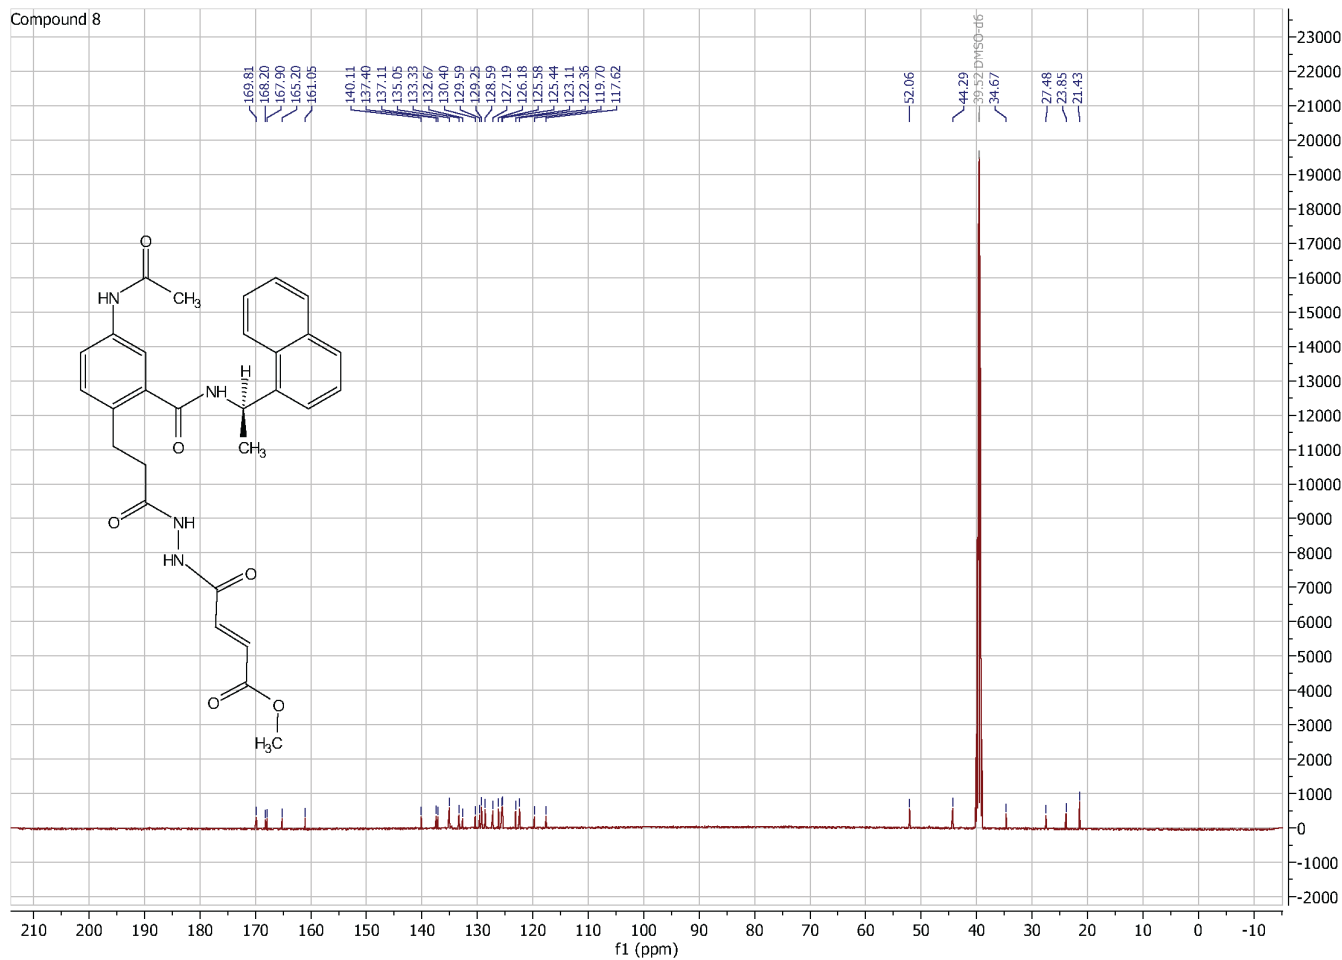

Supplementary Figure 42.  $^{13}\text{C}$  NMR spectrum of 8.

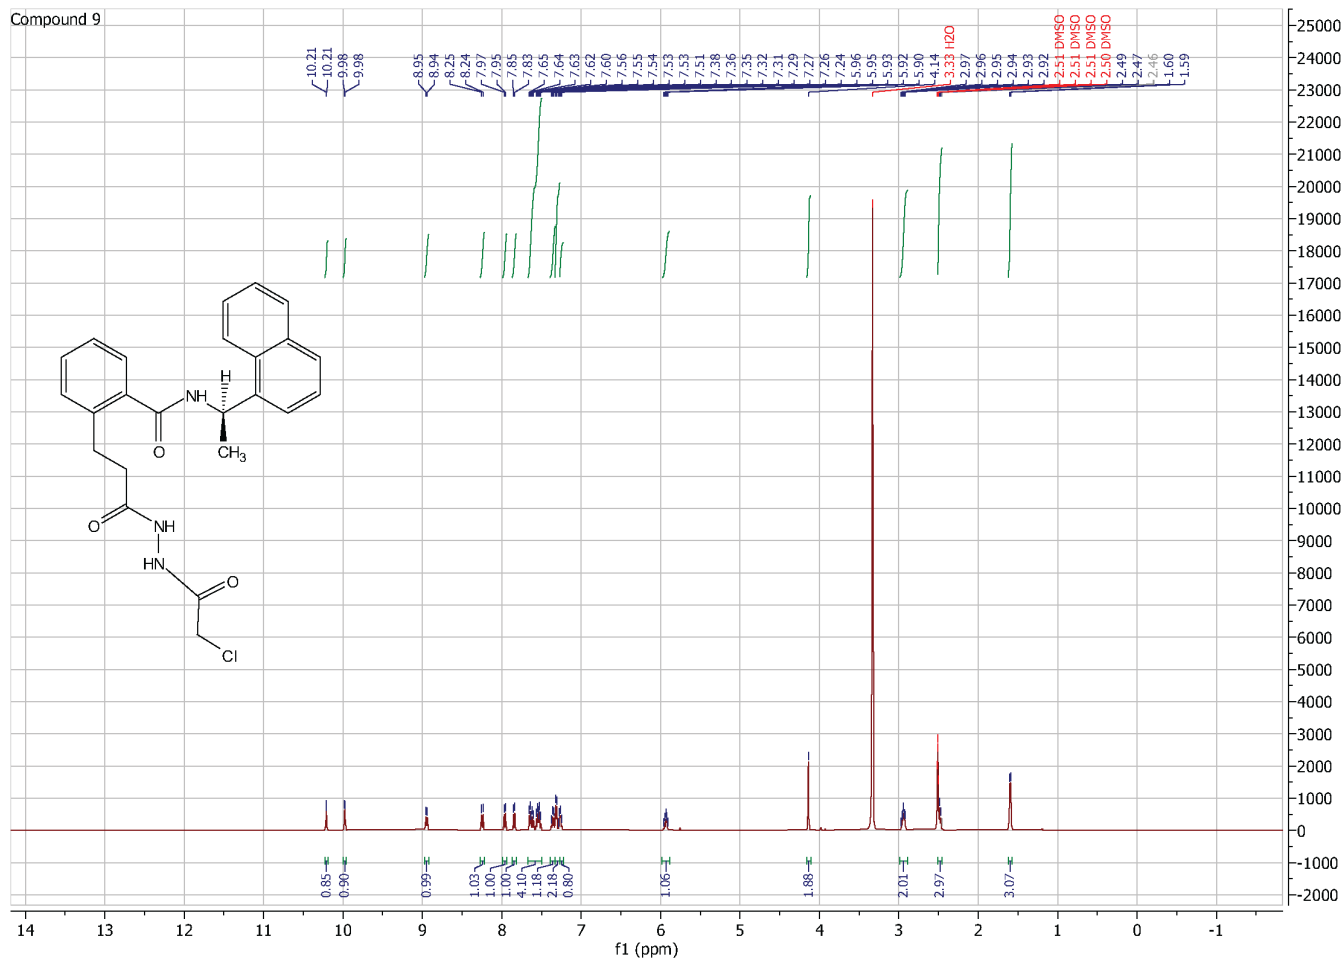

Supplementary Figure 43. <sup>1</sup>H NMR spectrum of 9.



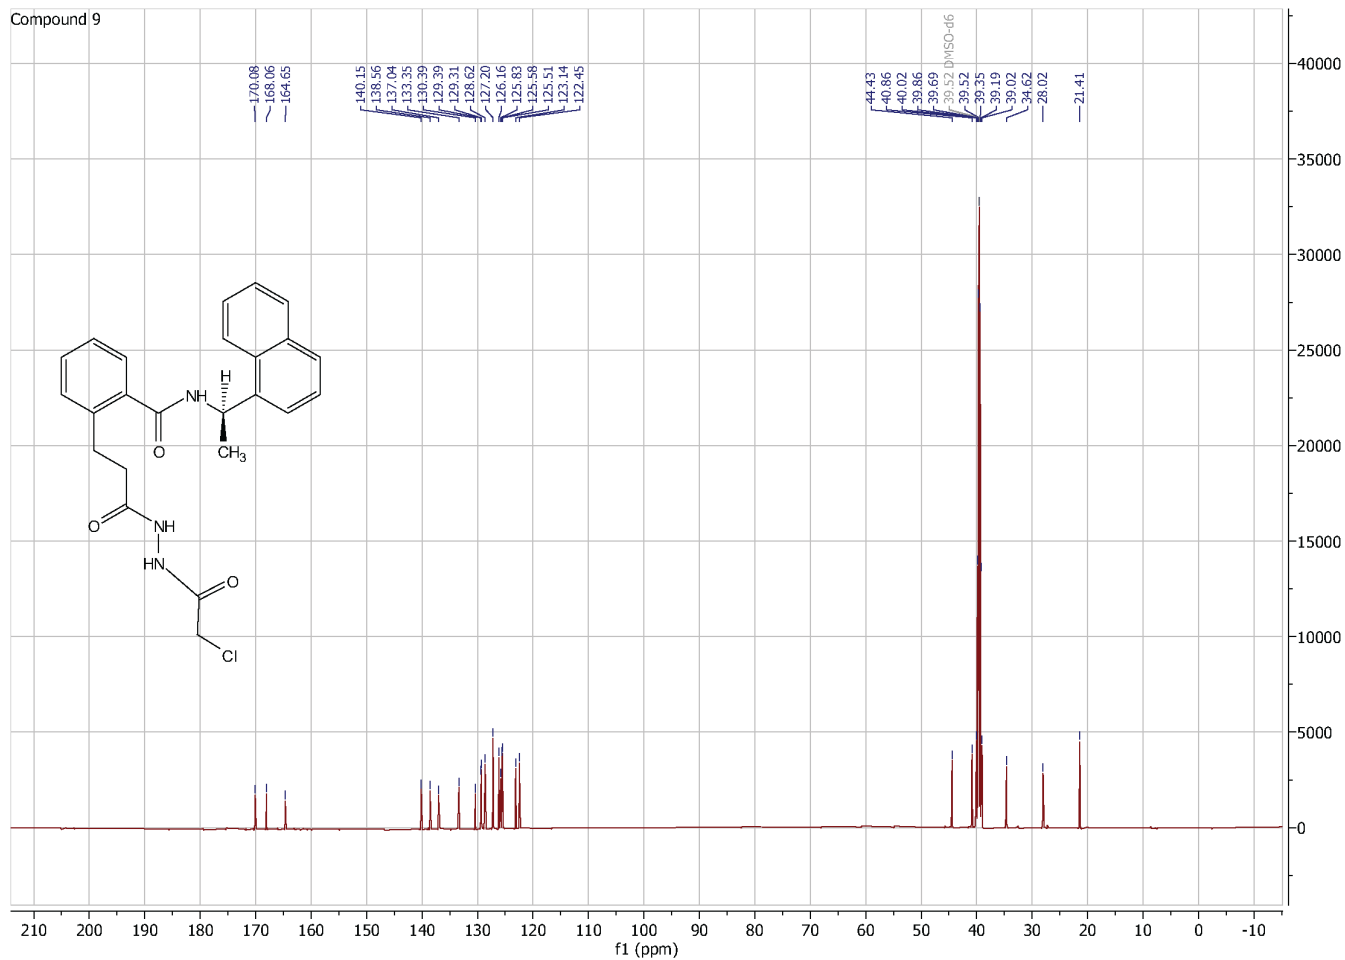

Supplementary Figure 44.  $^{13}\text{C}$  NMR spectrum of 9.

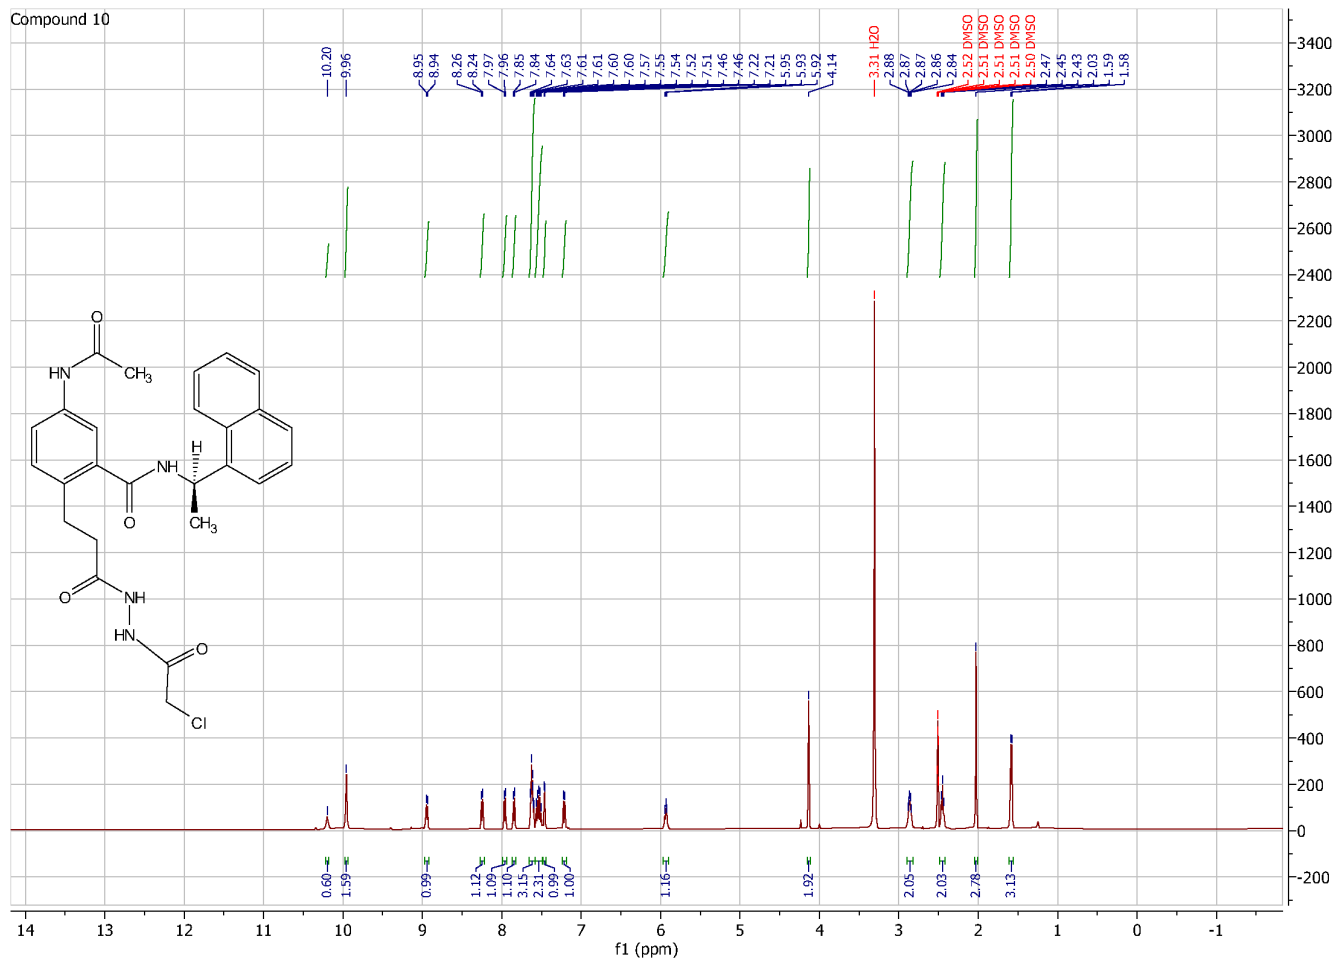

Supplementary Figure 45. <sup>1</sup>H NMR spectrum of 10.

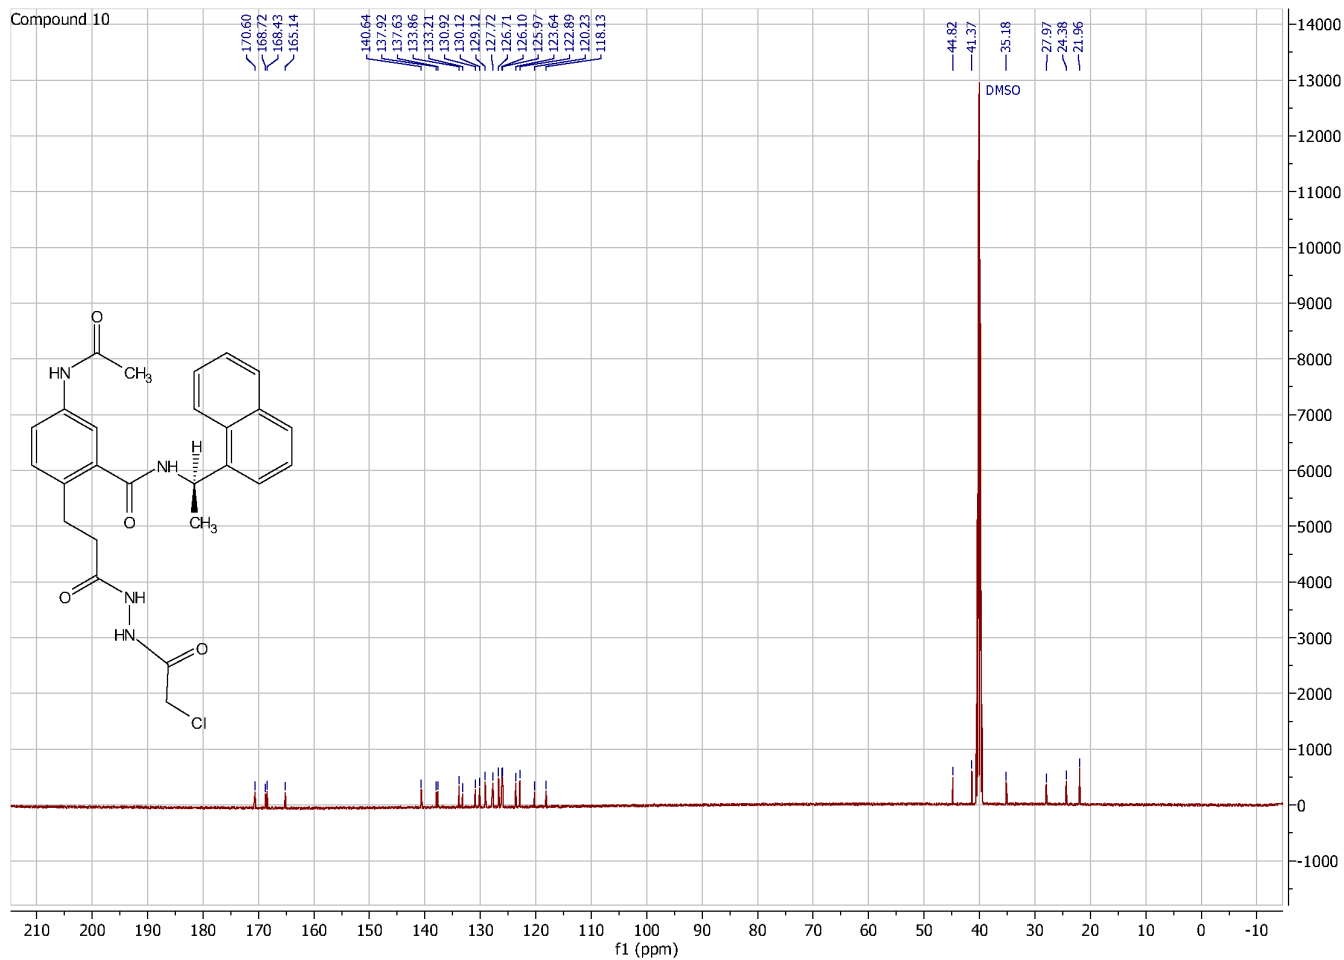

Supplementary Figure 46.  $^{13}\text{C}$  NMR spectrum of 10.

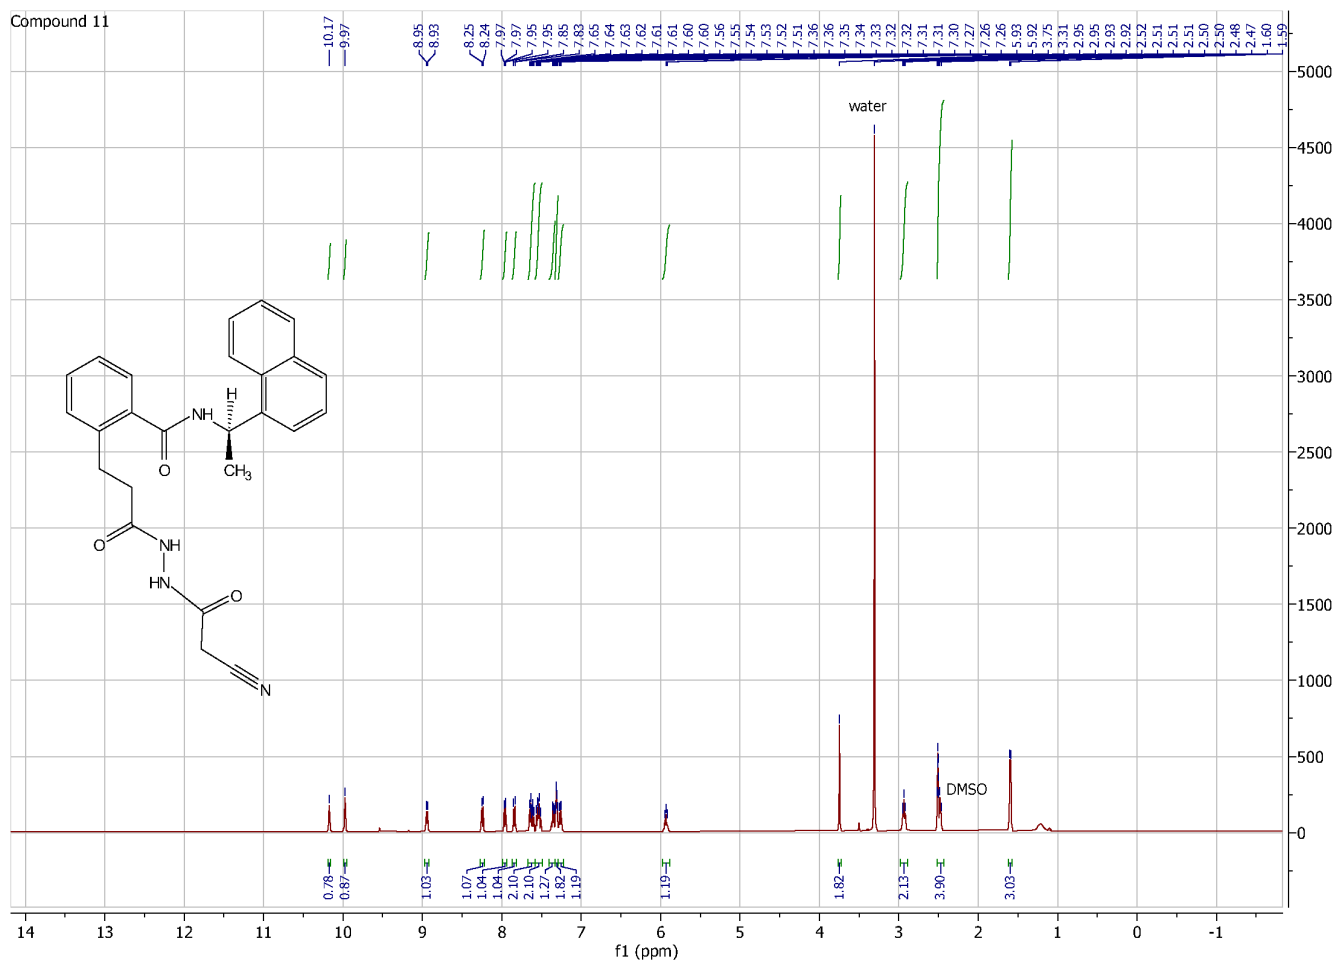

Supplementary Figure 47.  $^1\text{H}$  NMR spectrum of 11.

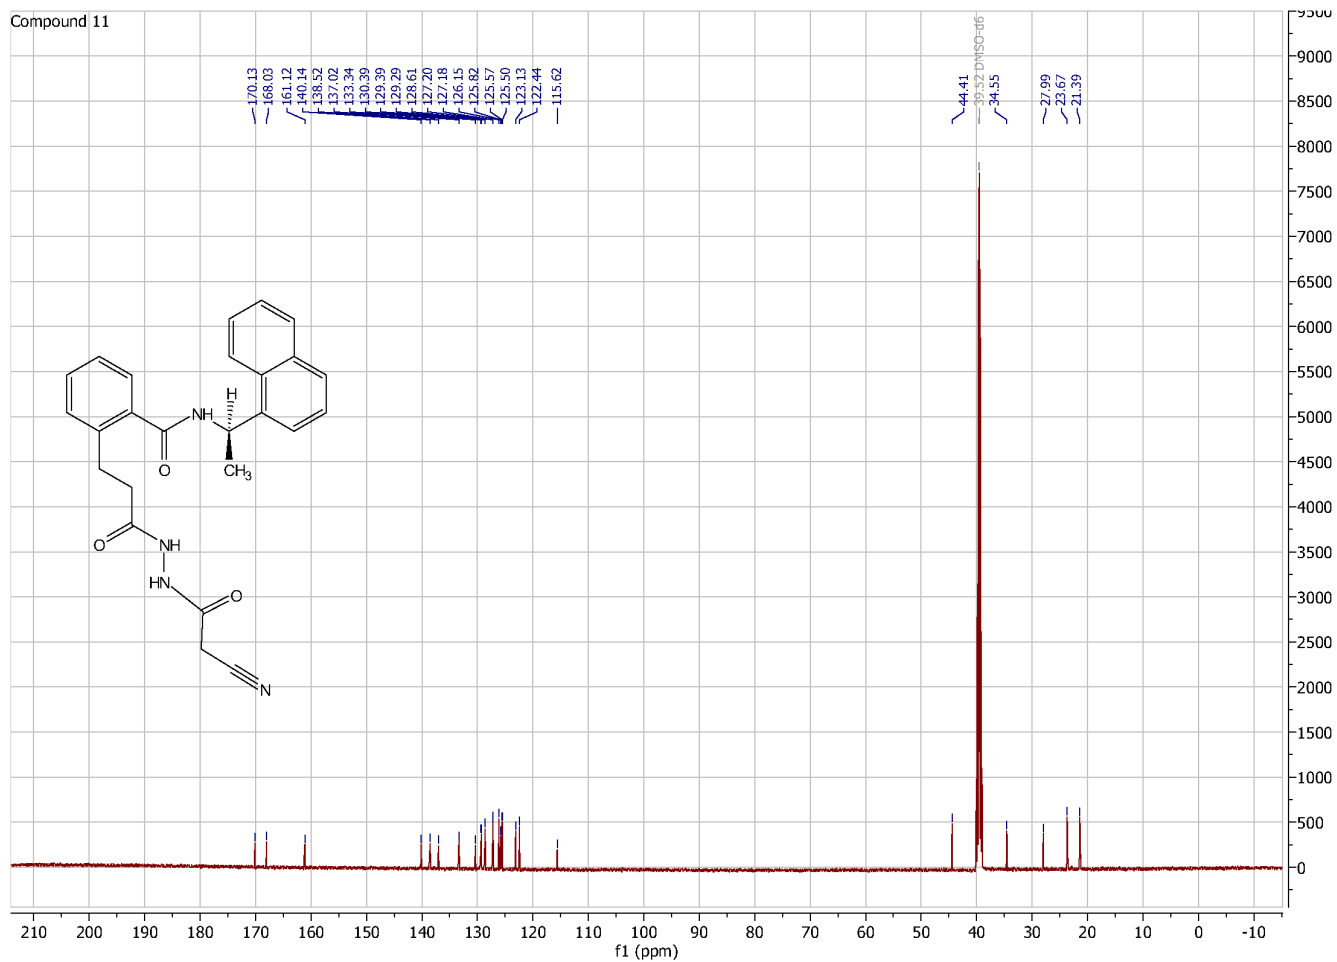

Supplementary Figure 48.  $^{13}\text{C}$  NMR spectrum of 11.

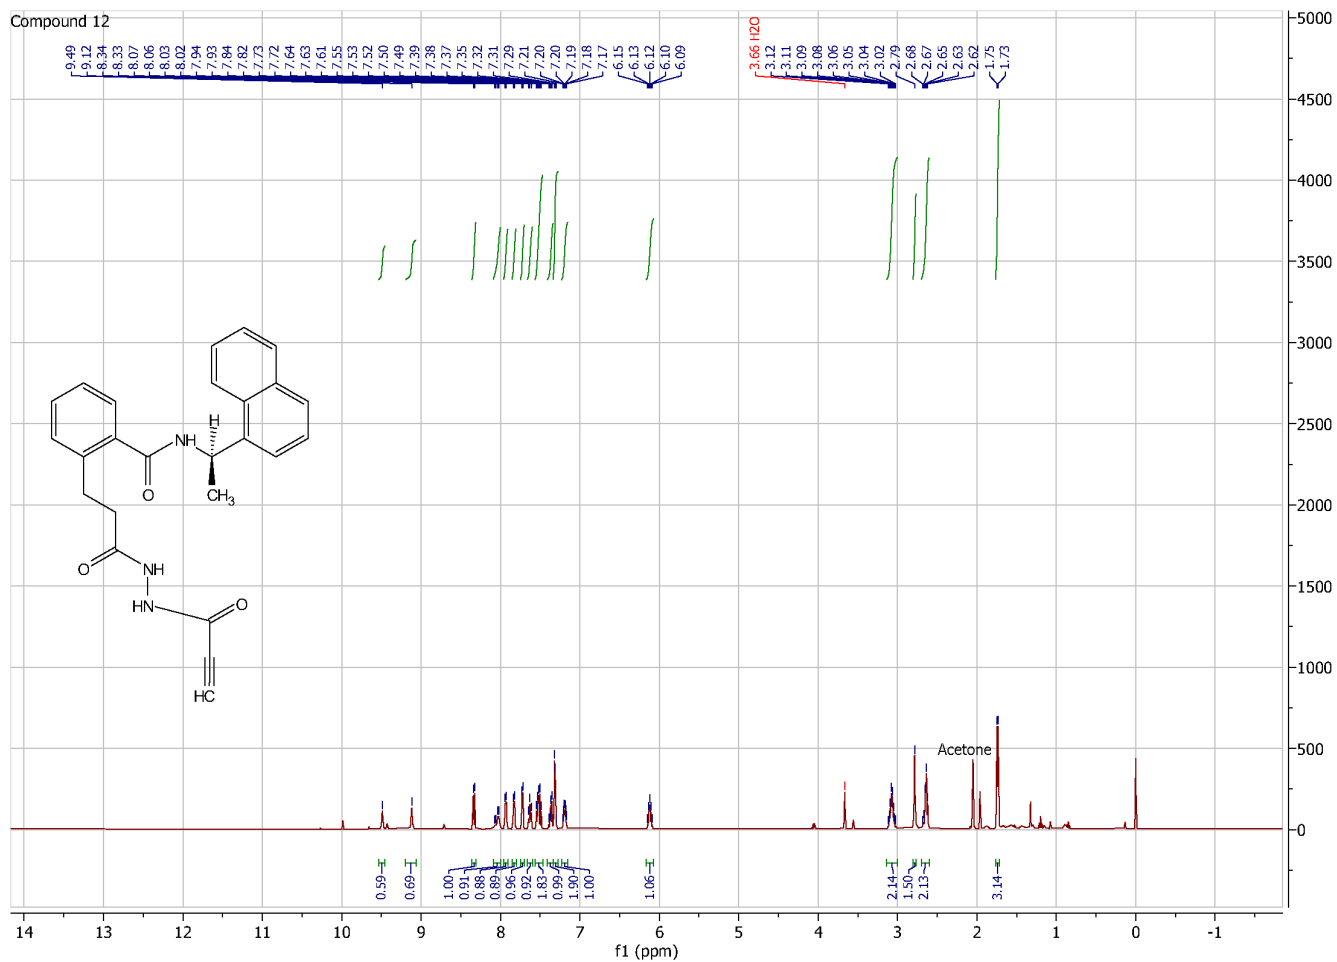

Supplementary Figure 49. <sup>1</sup>H NMR spectrum of 12.

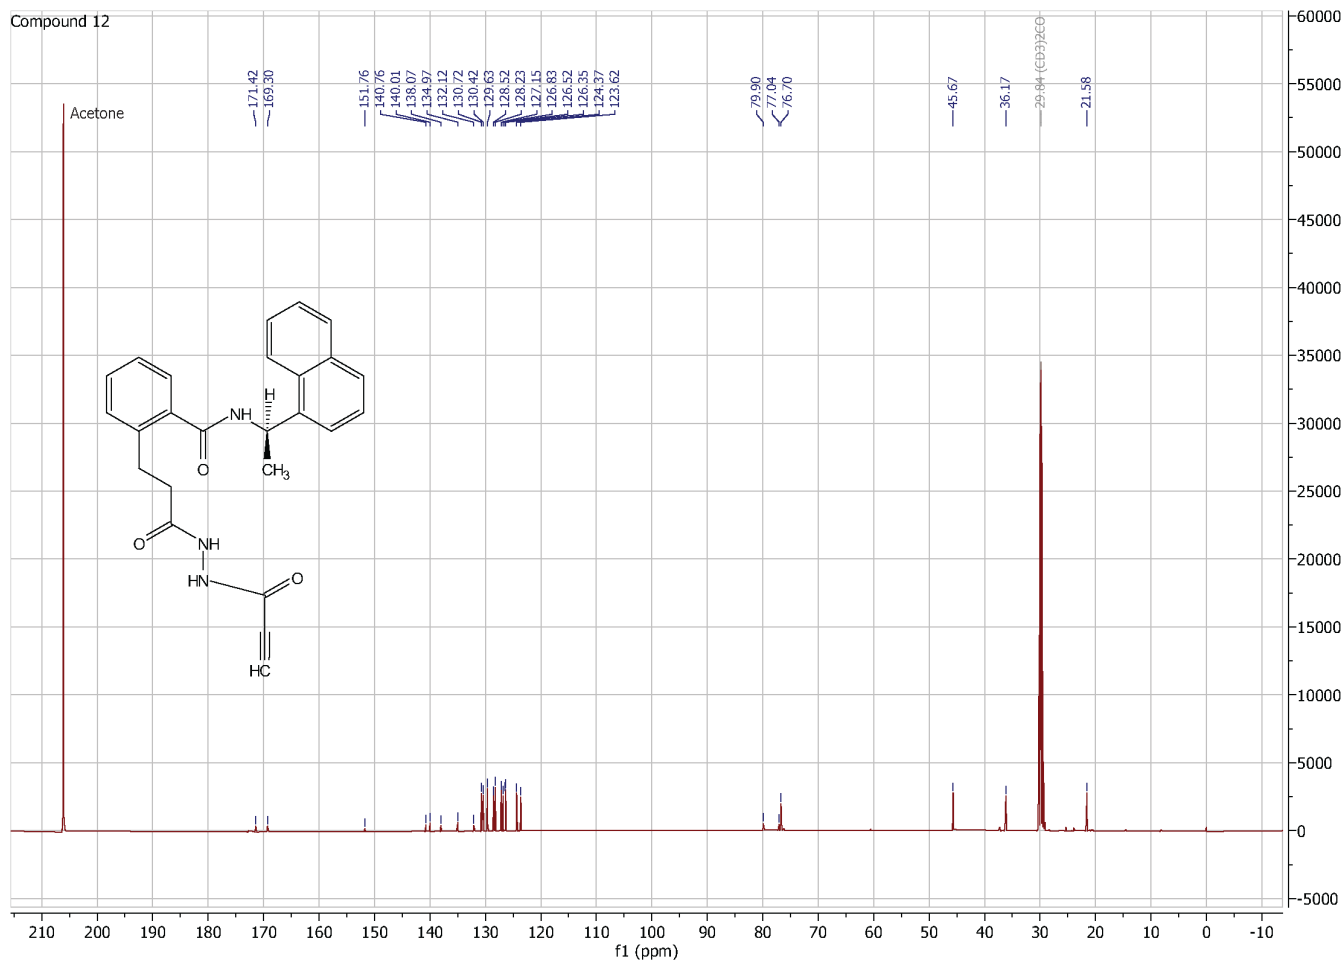

Supplementary Figure 50. <sup>13</sup>C NMR spectrum of 12.

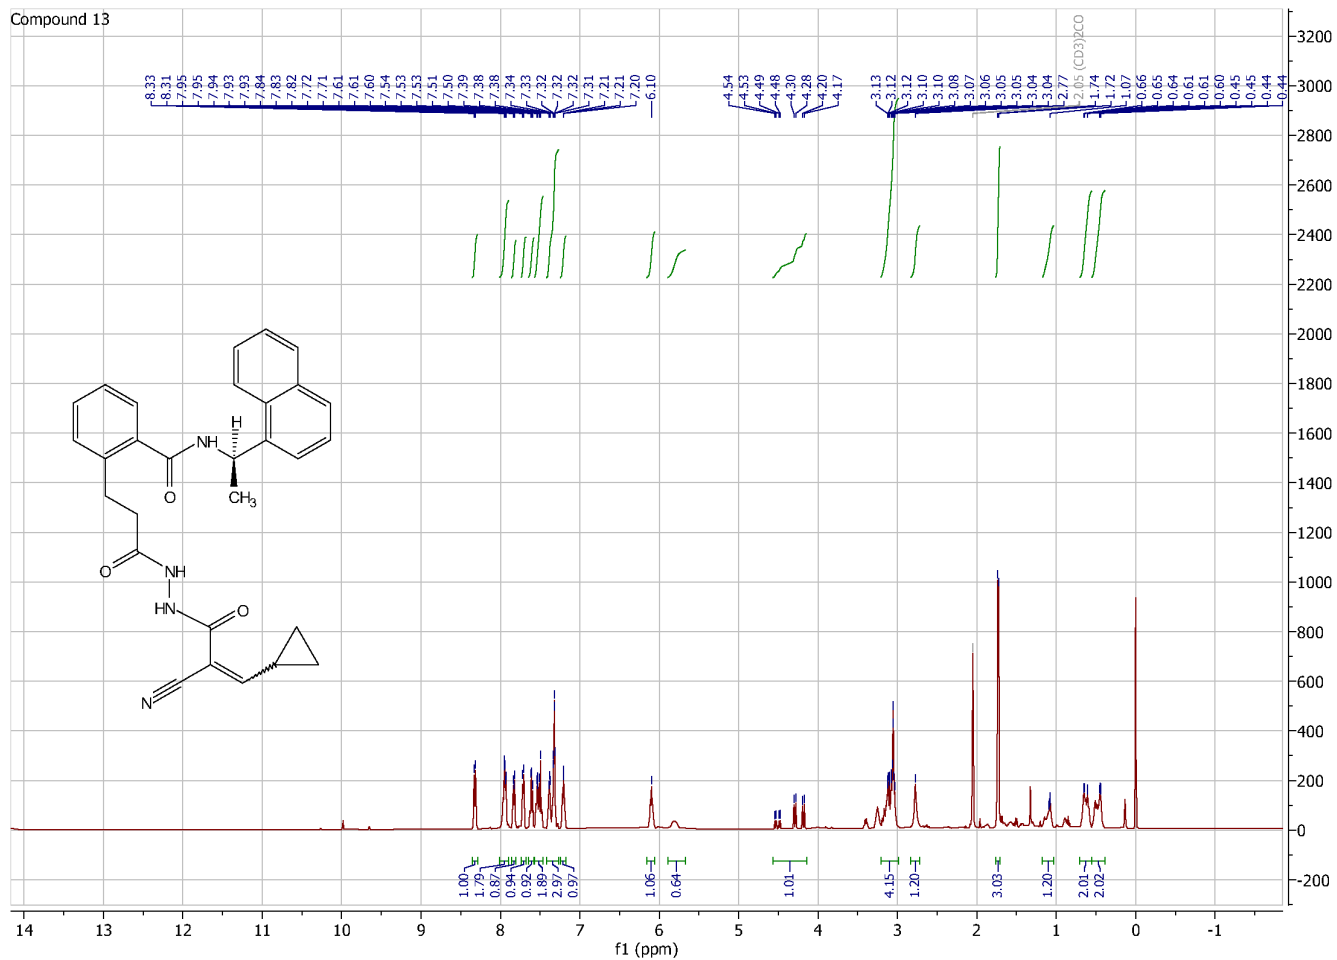

Supplementary Figure 51.  $^1\text{H}$  NMR spectrum of 13.



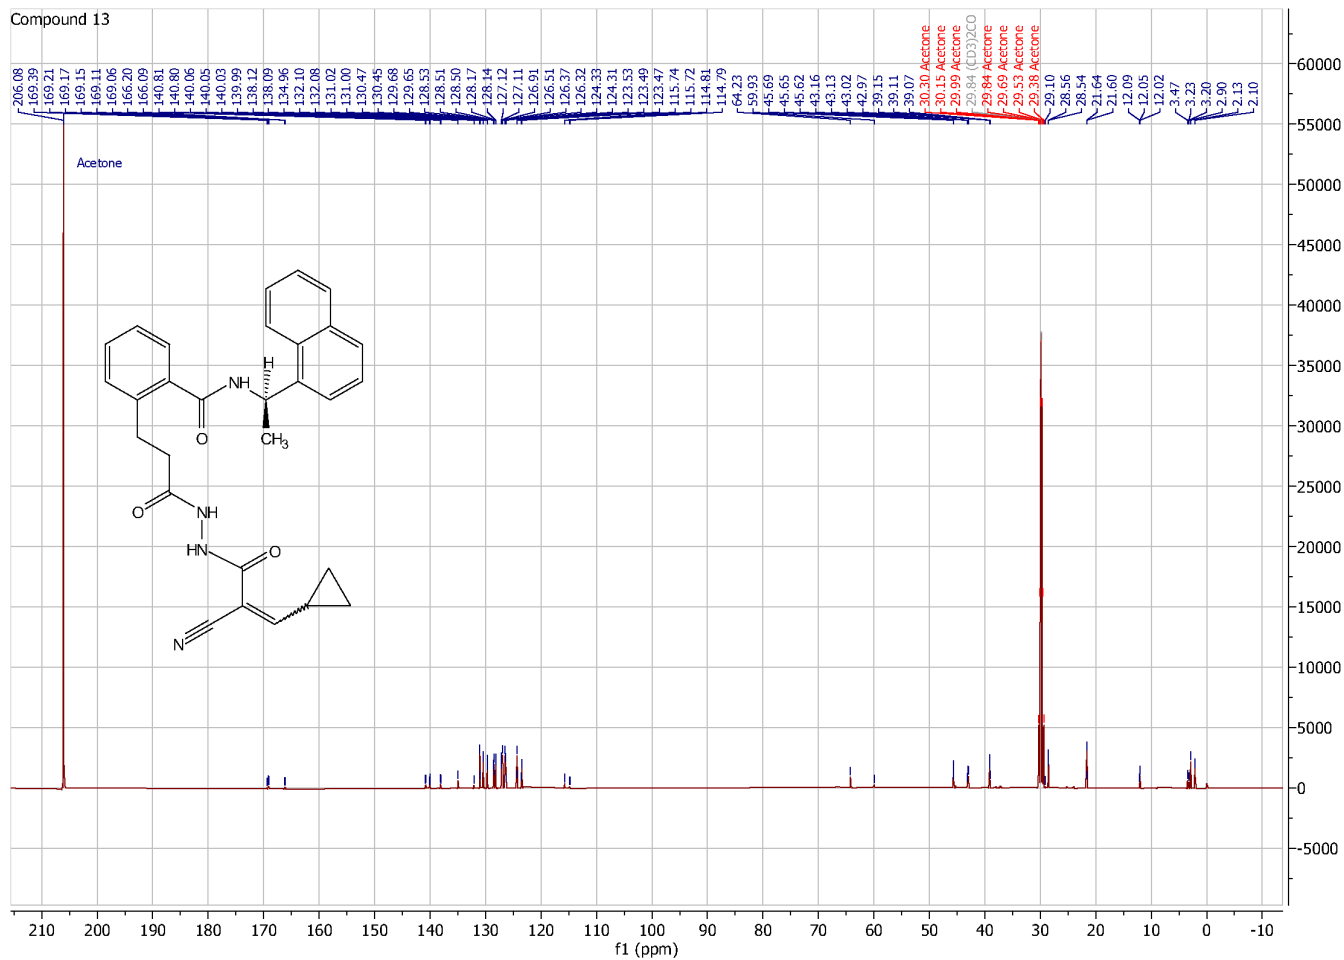

Supplementary Figure 52.  $^{13}\text{C}$  NMR spectrum of 13.
