# Supplementary material
Source: PubMed Central journal article supplement (PMC10050416)
Supplement: 41467_2023_37254_MOESM3_ESM.pdf [file 41467_2023_37254_MOESM3_ESM.pdf]

## **Description of Additional Supplementary Files**

**Supplementary Data 1:** Noncovalent and covalent docking scores for candidate inhibitors
